# Supplementary material for: Chondrosterins A–E, Triquinane-Type Sesquiterpenoids from Soft Coral-Associated Fungus Chondrostereum sp
Source: PubMed Central journal article supplement (PMC3347020; doi:10.3390/md10030627), 2012-03-13
Supplement: marinedrugs-10-00627-s001.pdf [file marinedrugs-10-00627-s001.pdf]

# Supporting Information

## Chondrosterins A–E , Triquinane-Type Sesquiterpenoids from Soft Coral-Associated Fungus

### *Chondrostereum* sp.

Hou-Jin Li <sup>1</sup>, Ying-Lu Xie <sup>1</sup>, Zhong-Liang Xie <sup>2</sup>, Ying Chen <sup>1</sup>, Chi-Keung Lam <sup>1</sup> and Wen-Jian Lan <sup>2,\*</sup>

<sup>1</sup> School of Chemistry and Chemical Engineering, Sun Yat-sen University, Guangzhou 510275, P. R. China; E-Mails: ceslhj@mail.sysu.edu.cn(H.L.); 359160016@qq.com(Y.X.); 540170598@qq.com(Y.C.); cklam@mail.sysu.edu.cn(C. L.)

<sup>2</sup> School of Pharmaceutical Sciences, Sun Yat-sen University, Guangzhou 510006, P. R. China; E-Mails: 908129138@qq.com (Z.X.); lanwj@mail.sysu.edu.cn (W.L.)

\* Author to whom correspondence should be addressed; E-Mail: lanwj@mail.sysu.edu.cn (W. L.); Tel.: +86-20-39943042; Fax: +86-20-39943000.

#### Table of Contents

S1: HREIMS of chondrosterin A (1)

S2: <sup>1</sup>H NMR (500 MHz, CDCl<sub>3</sub>) spectrum of chondrosterin A (1)

S3: <sup>13</sup>C NMR (125 MHz, CDCl<sub>3</sub>) spectrum of chondrosterin A (1)

S4: gHMOC of chondrosterin A (1)

S5: gHMBC of chondrosterin A (1)

S6: <sup>1</sup>H–<sup>1</sup>H gCOSY of chondrosterin A (1)

S7: ROESY of chondrosterin A (1)

S8: HREIMS of chondrosterin B (2)

S9:  $^1\text{H}$  NMR (500 MHz,  $\text{CDCl}_3$ ) spectrum of chondrosterin B (2)  
S10:  $^{13}\text{C}$  NMR (125 MHz,  $\text{CDCl}_3$ ) spectrum of chondrosterin B (2)  
S11: gHMQC of chondrosterin B (2)  
S12: gHMBC of chondrosterin B (2)  
S13:  $^1\text{H}$  NMR (400 MHz,  $[\text{D}_6]\text{DMSO}$ ) spectrum of chondrosterin B (2)  
S14: ROESY of chondrosterin B (2) (400 MHz,  $[\text{D}_6]\text{DMSO}$ )  
S15: HREIMS of chondrosterin C (3)  
S16:  $^1\text{H}$  NMR (500 MHz,  $\text{CDCl}_3$ ) spectrum of chondrosterin C (3)  
S17:  $^{13}\text{C}$  NMR (125 MHz,  $\text{CDCl}_3$ ) spectrum of chondrosterin C (3)  
S18: gHMQC of chondrosterin C (3)  
S19: gHMBC of chondrosterin C (3)  
S20:  $^1\text{H}$ - $^1\text{H}$  gCOSY of chondrosterin C (3)  
S21: NOE of chondrosterin C (3)  
S22: HREIMS of chondrosterin D (4)  
S23:  $^1\text{H}$  NMR (500 MHz,  $\text{CDCl}_3$ ) spectrum of chondrosterin D (4)  
S24:  $^{13}\text{C}$  NMR (125 MHz,  $\text{CDCl}_3$ ) spectrum of chondrosterin D (4)  
S25: gHMQC of chondrosterin D (4)  
S26: gHMBC of chondrosterin D (4)  
S27: HREIMS of chondrosterin E (5)  
S28:  $^1\text{H}$  NMR (500 MHz,  $\text{CDCl}_3$ ) spectrum of chondrosterin E (5)  
S29:  $^{13}\text{C}$  NMR (125 MHz,  $\text{CDCl}_3$ ) spectrum of chondrosterin E (5)  
S30: gHMQC of chondrosterin E (5)  
S31: gHMBC of chondrosterin E (5)  
S32:  $^1\text{H}$ - $^1\text{H}$  gCOSY of chondrosterin E (5)  
S33: ROESY of chondrosterin E (5)

Full ms [227.500 - 246.500] - Range: 232.000 - 232.500

Scan No. 11 of 15

Scan #: 11

RT: 0.44

Data points: 1

| Mass     | Relative Intensity | Theoretical Mass | Delta [ppm] | Delta [mmu] | RDB | Composition                                    |
|----------|--------------------|------------------|-------------|-------------|-----|------------------------------------------------|
| 232.1456 | 100.0              | 232.1458         | -0.7        | -0.2        | 6.0 | C <sub>15</sub> H <sub>20</sub> O <sub>2</sub> |

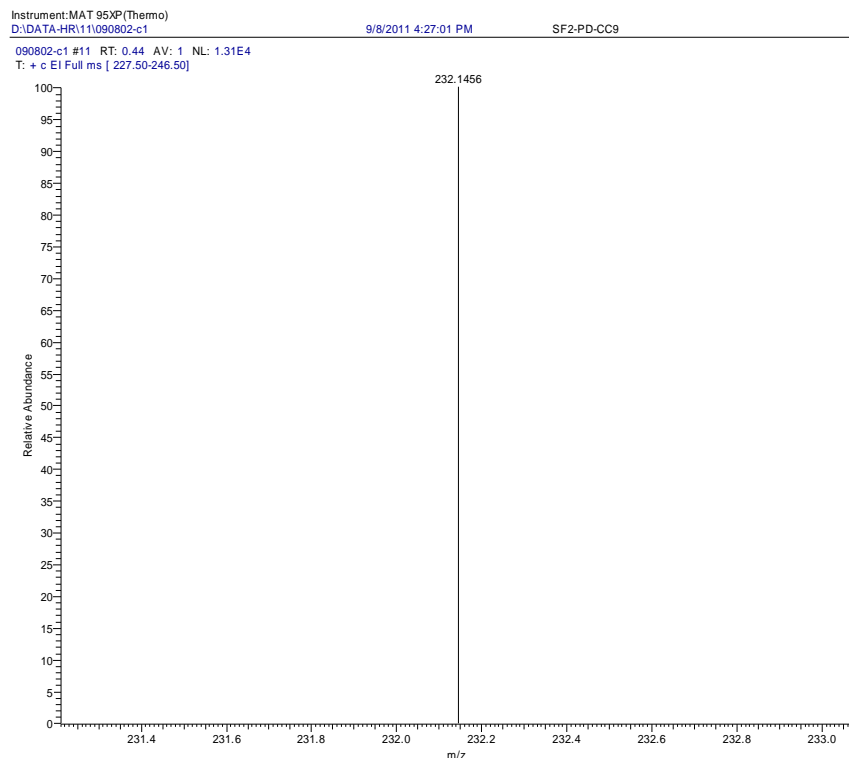

S1: HREIMS of chondrosterin A (1)

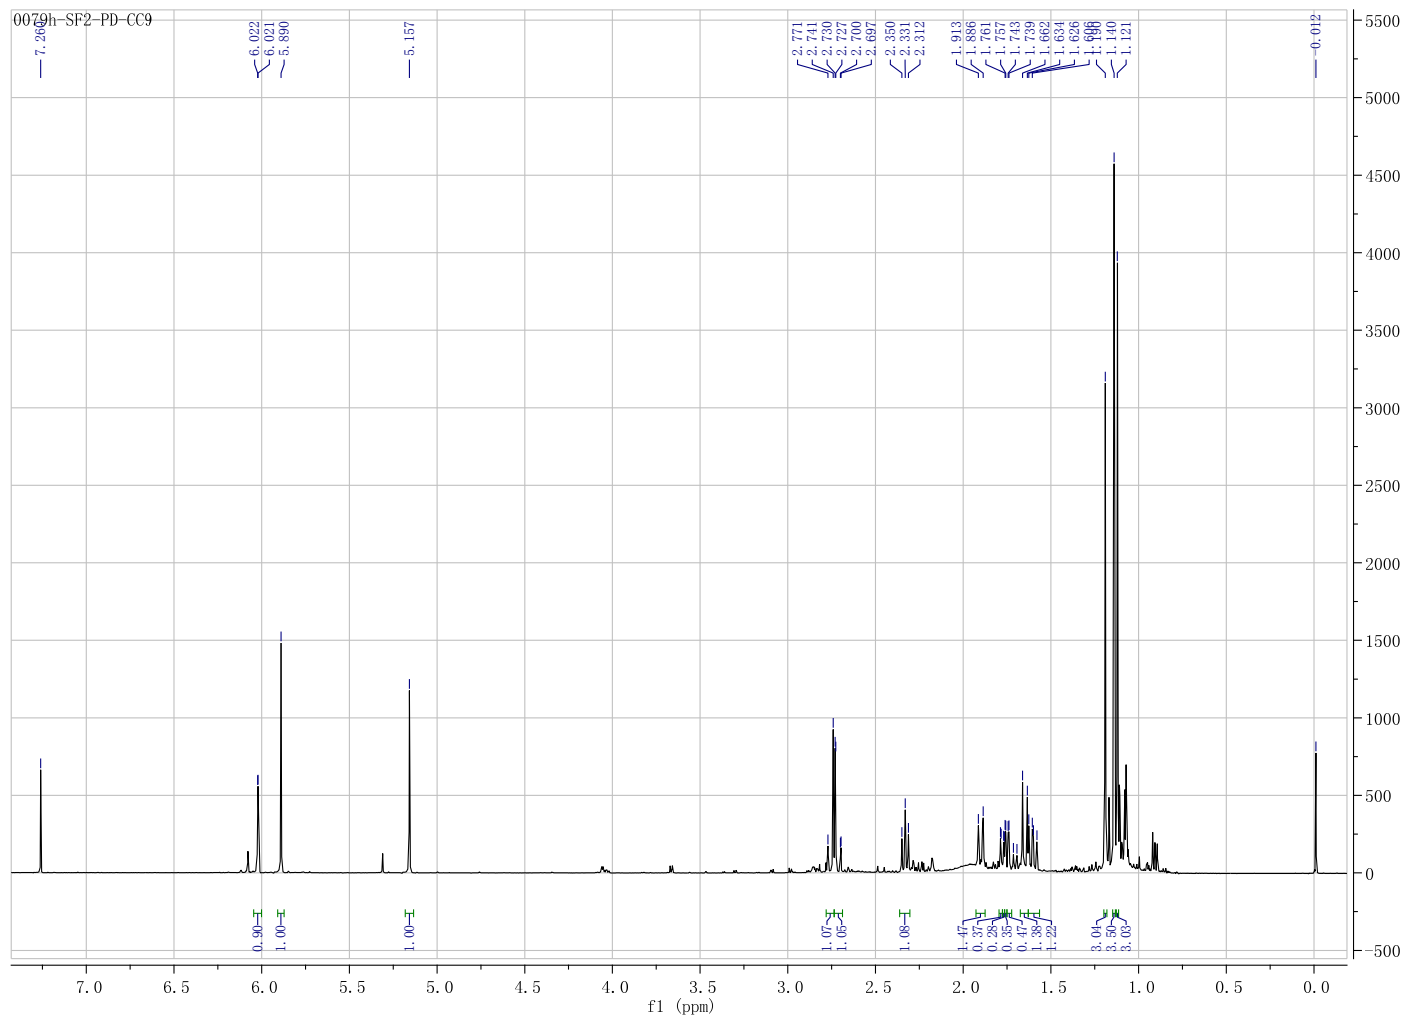

S2:  $^1\text{H}$  NMR (500 MHz,  $\text{CDCl}_3$ ) spectrum of chondrosterin A (**1**)

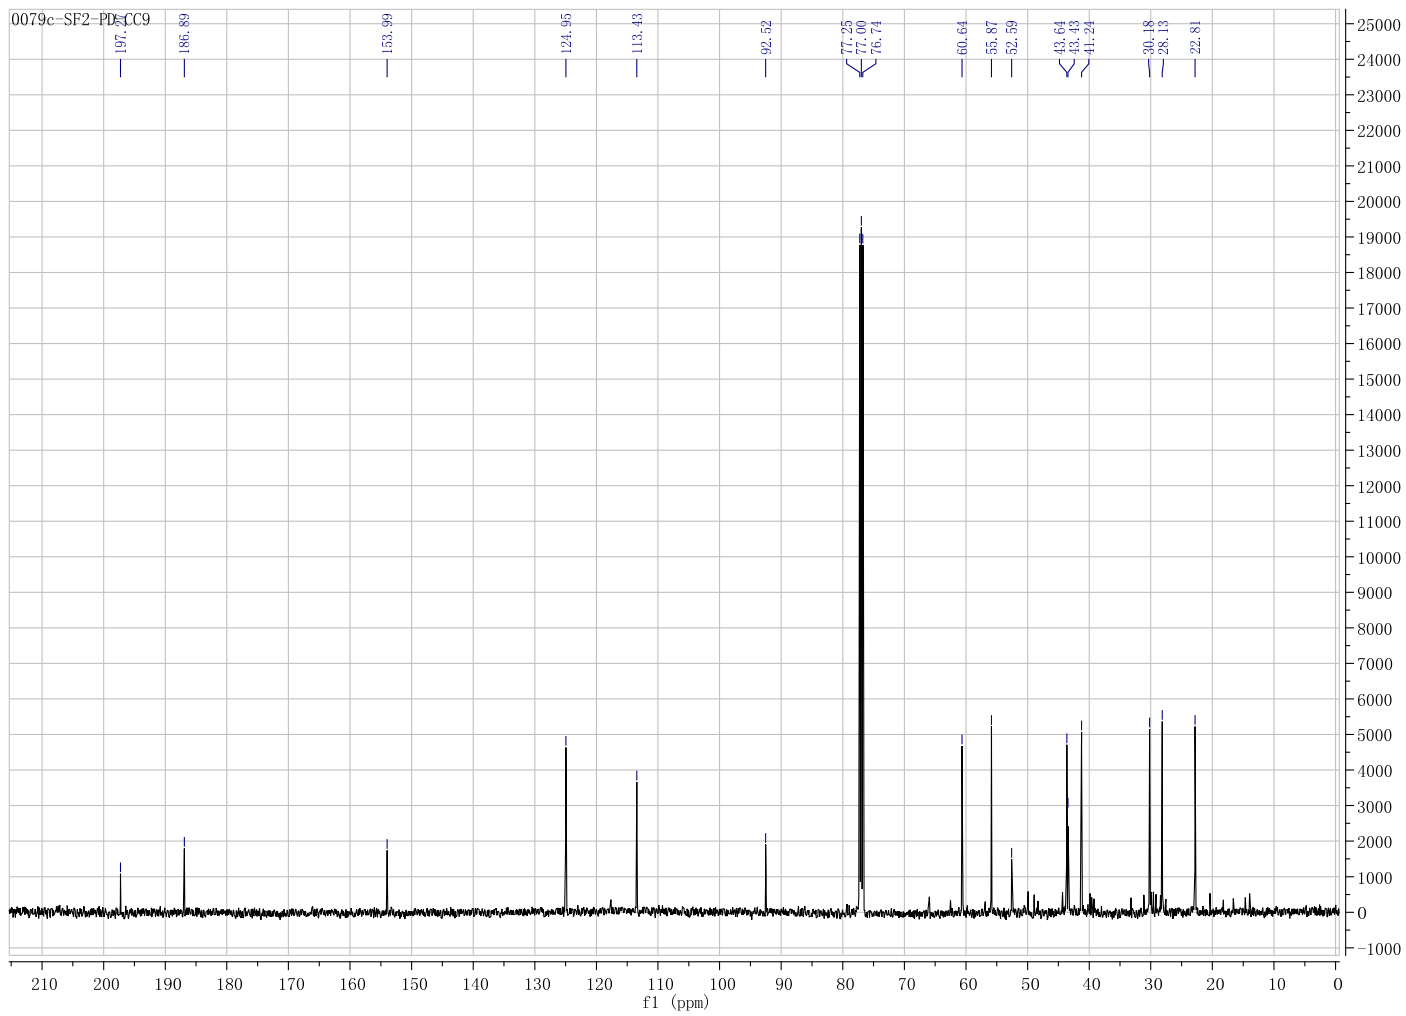

S3:  $^{13}\text{C}$  NMR (125 MHz,  $\text{CDCl}_3$ ) spectrum of chondrosterin A (**1**)

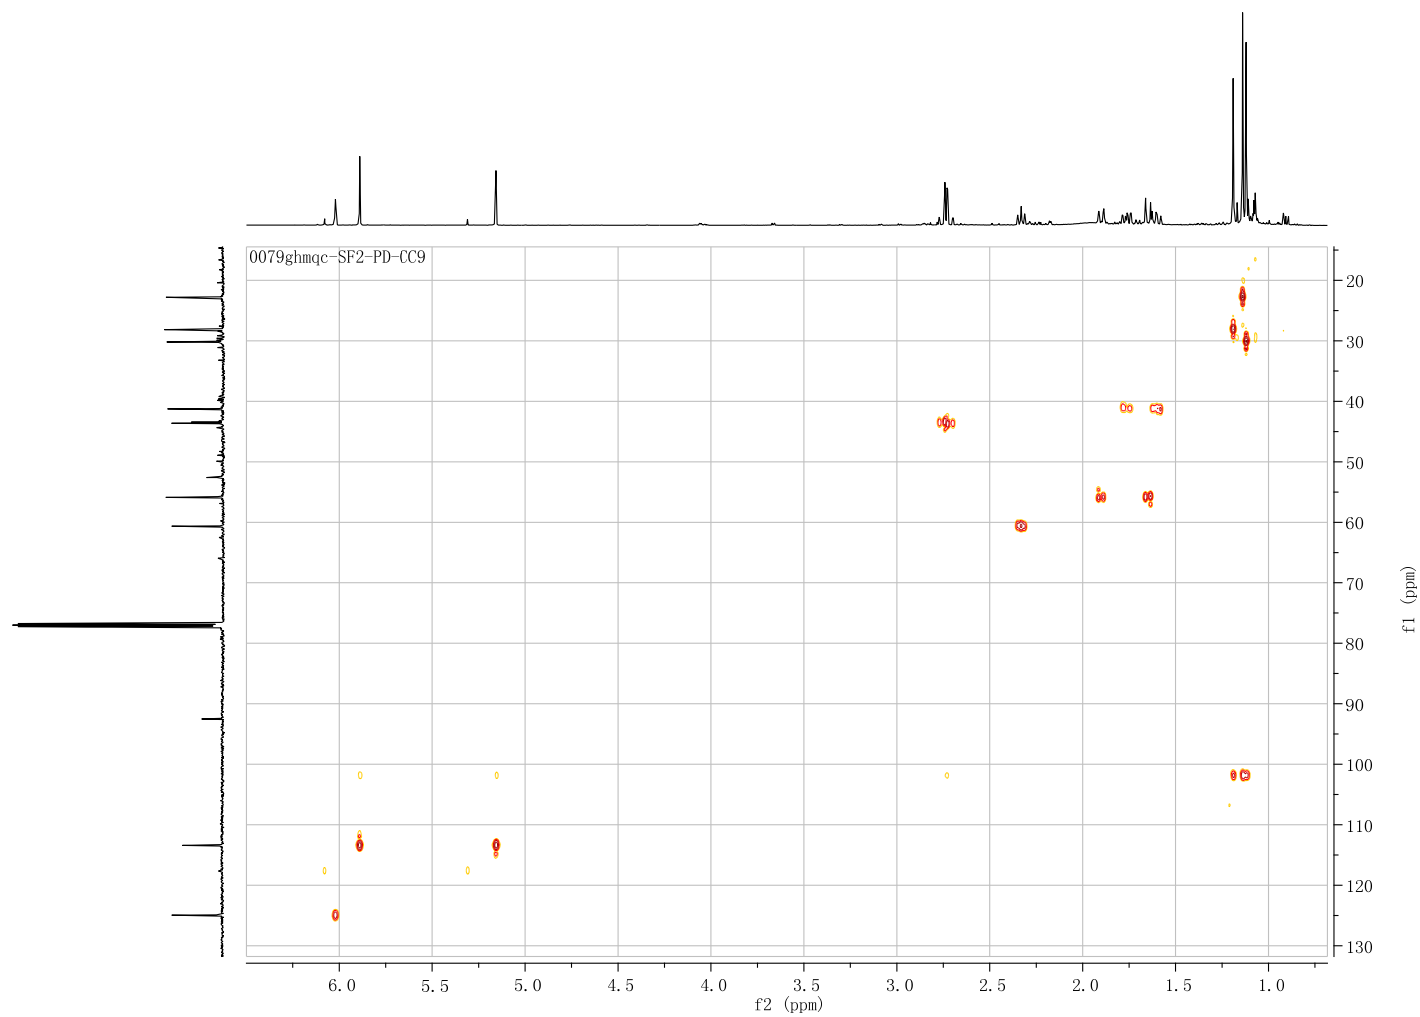

S4: gHMQC of chondrosterin A (1)

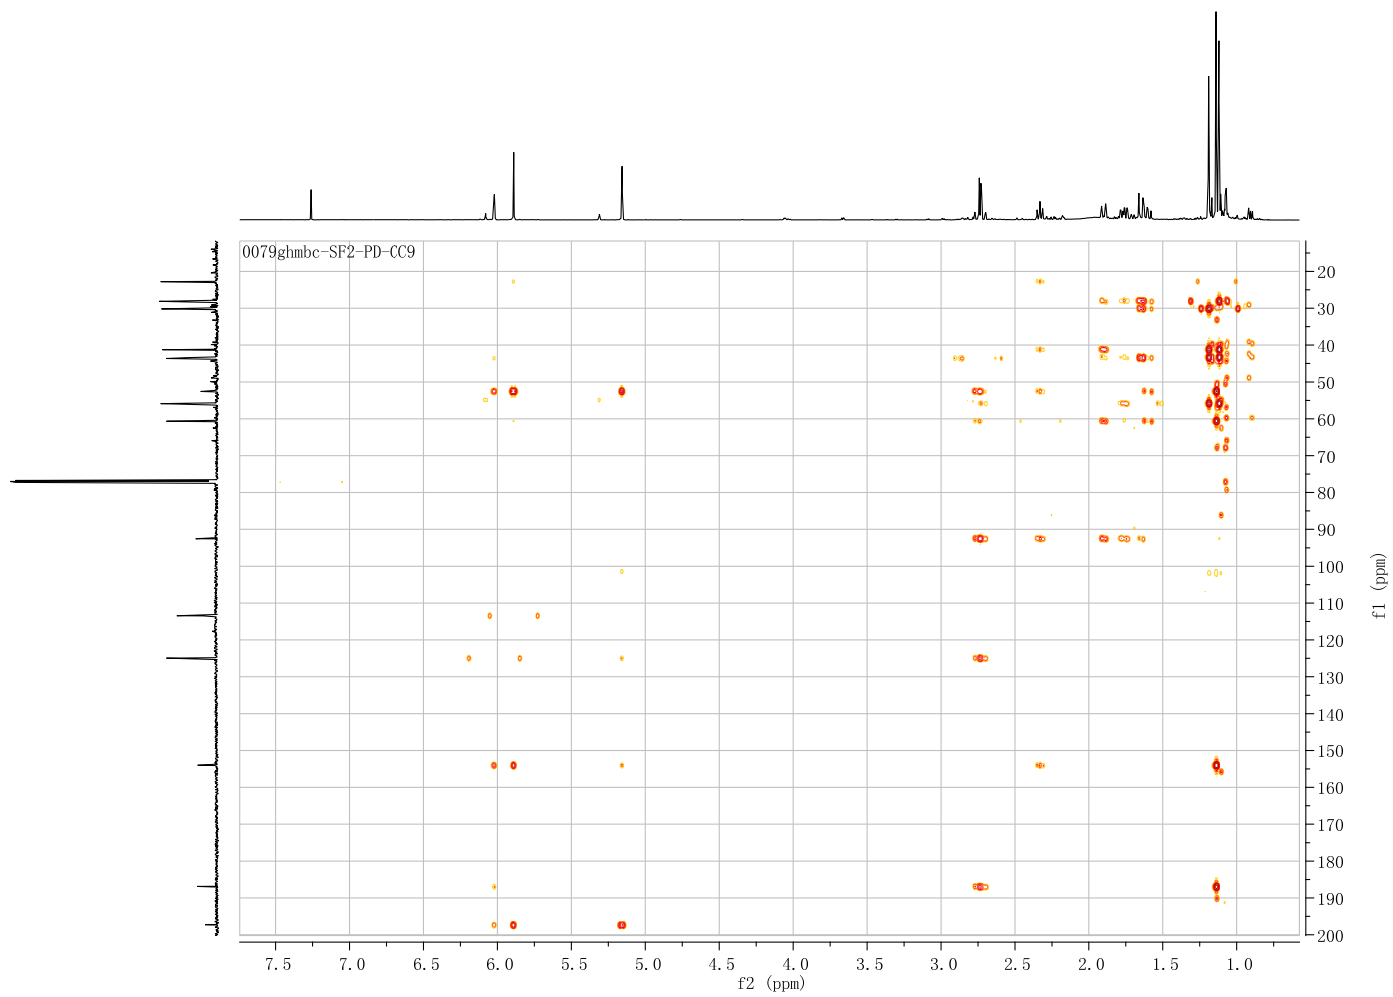

S5: gHMBC of chondrosterin A (1)

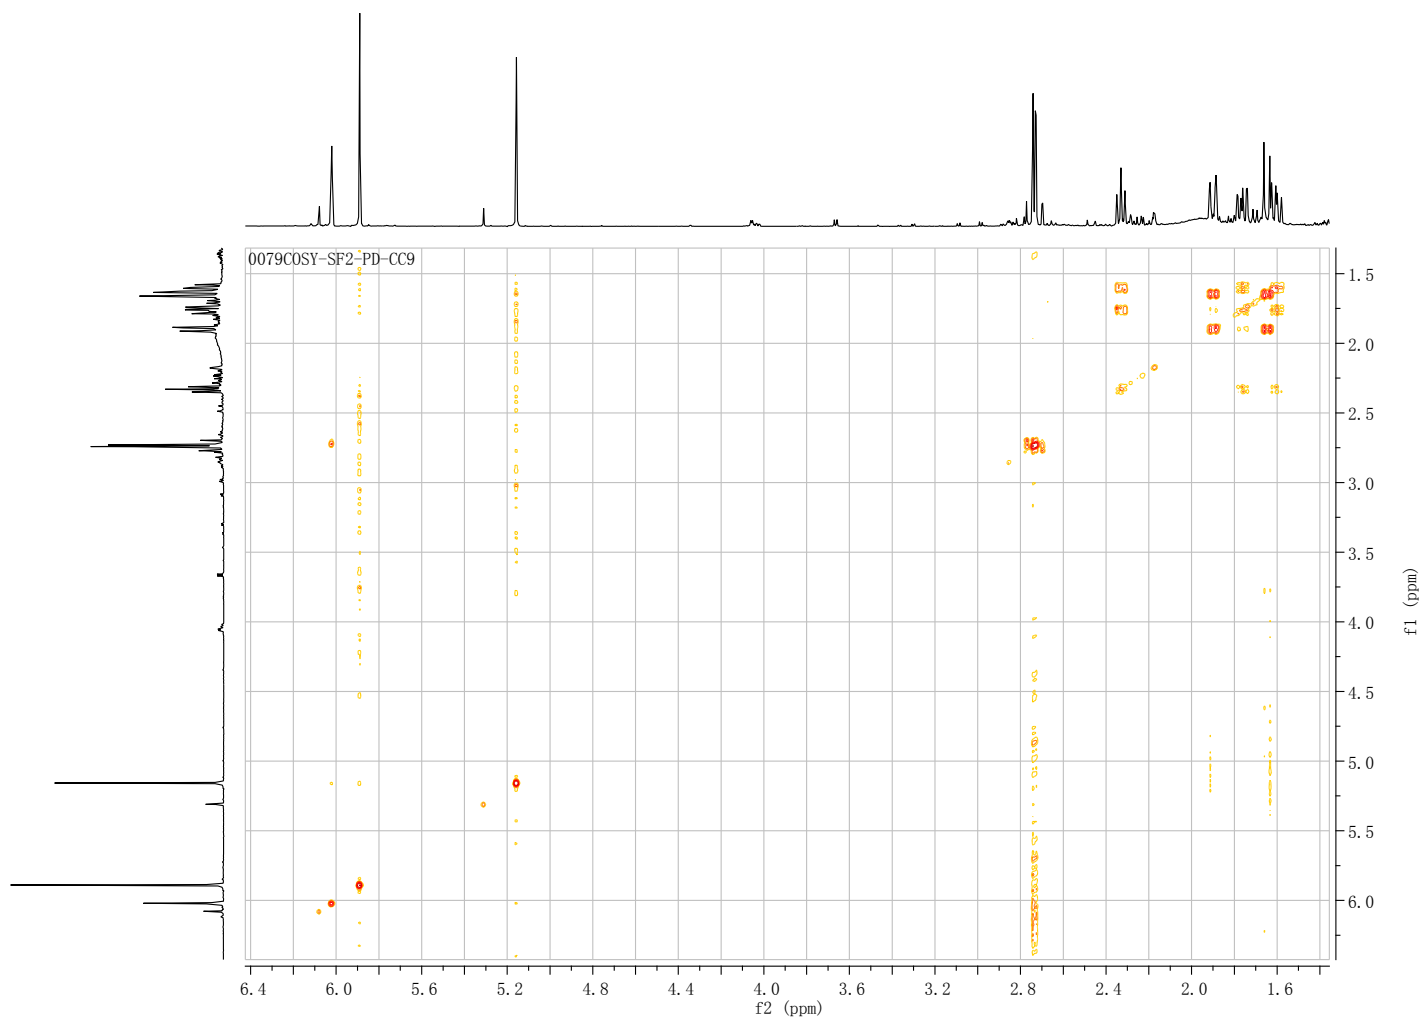

S6:  $^1\text{H}$ - $^1\text{H}$  gCOSY of chondrosterin A (**1**)



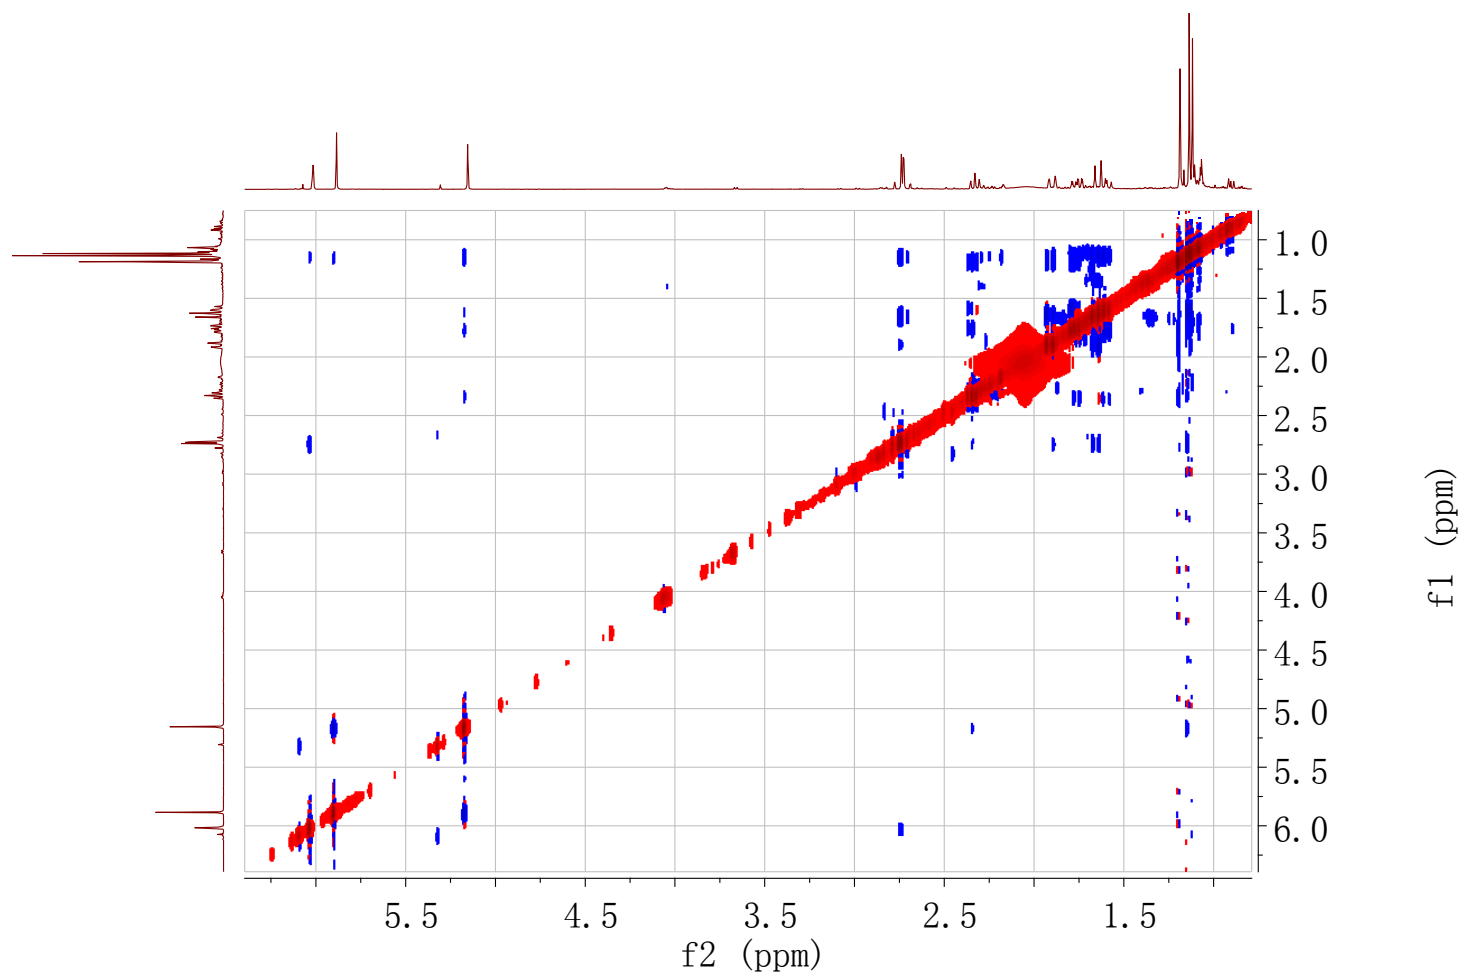

S7: ROESY of chondrosterin A (**1**)

Full ms [239.500 - 258.500] - Range: 246.000 - 246.500

Scan No. 16 of 16

Scan #: 16

RT: 0.60

Data points: 1

| Mass     | Relative Intensity | Theoretical Mass | Delta [ppm] | Delta [mmu] | RDB  | Composition                                        |
|----------|--------------------|------------------|-------------|-------------|------|----------------------------------------------------|
| 246.1250 | 77.1               | 246.1250         | -0.3        |             | -0.1 | 7.0 C <sub>15</sub> H <sub>18</sub> O <sub>3</sub> |

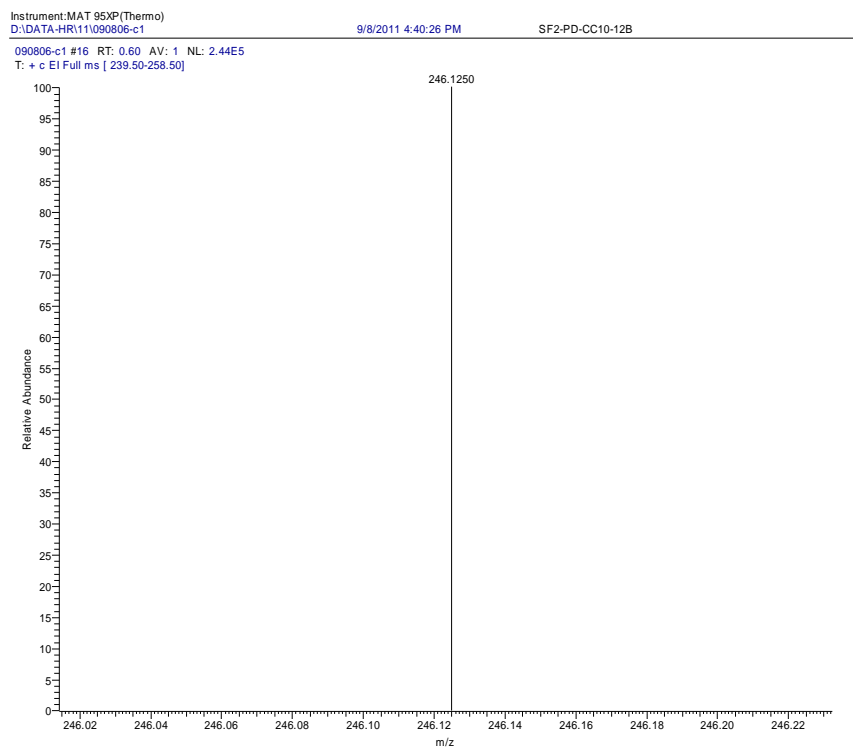

S8: HREIMS of chondrosterin B (2)

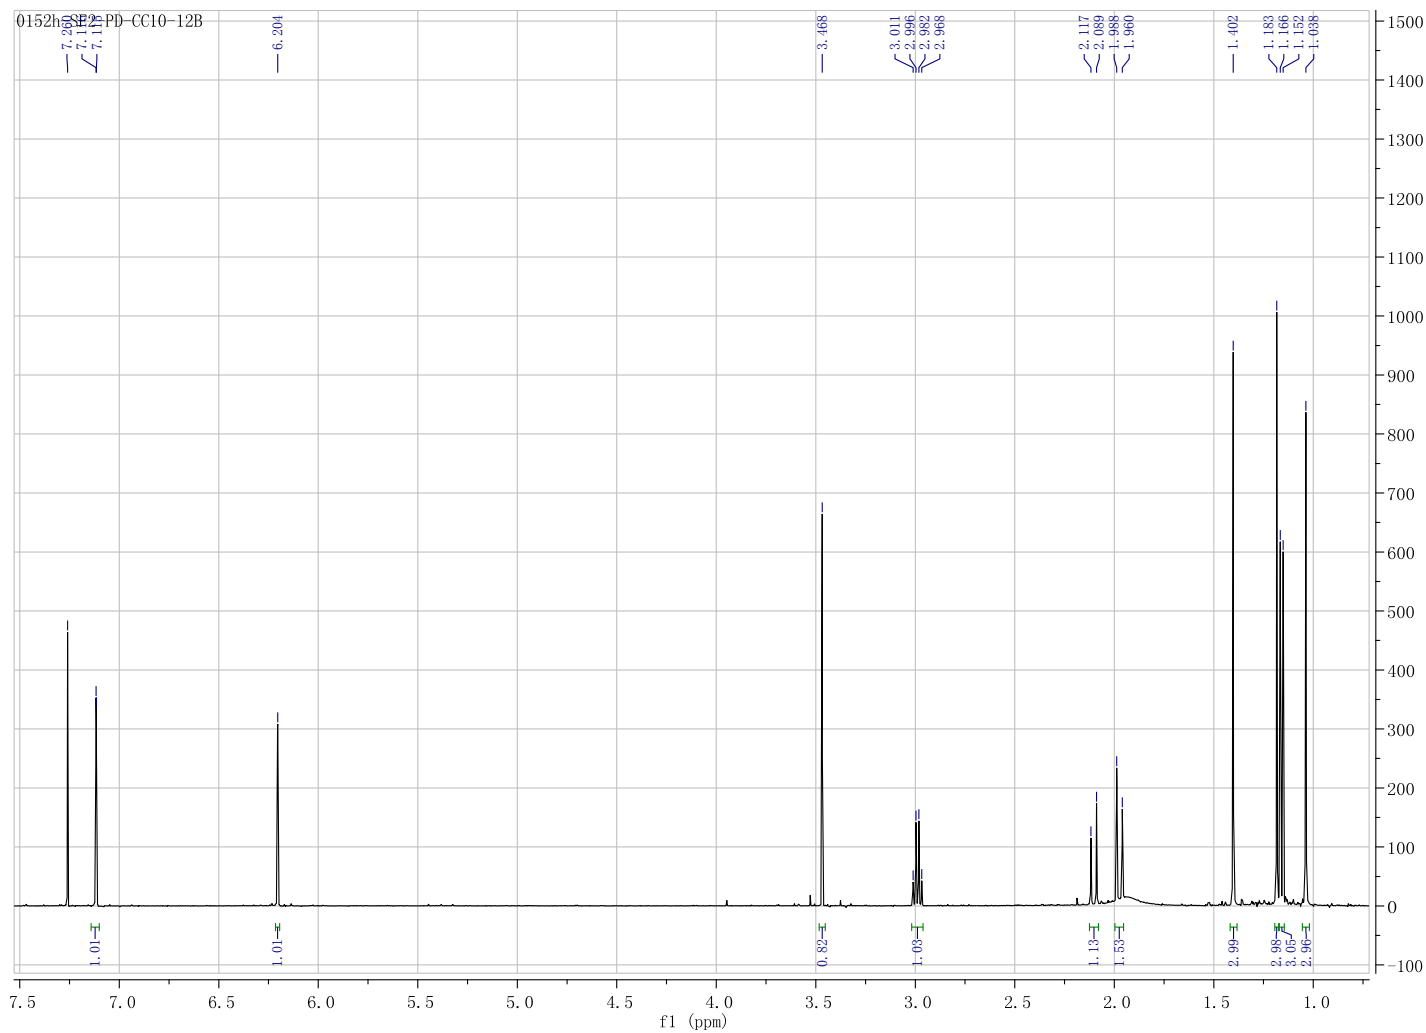

S9:  $^1\text{H}$  NMR (500 MHz,  $\text{CDCl}_3$ ) spectrum of chondrosterin B (**2**)

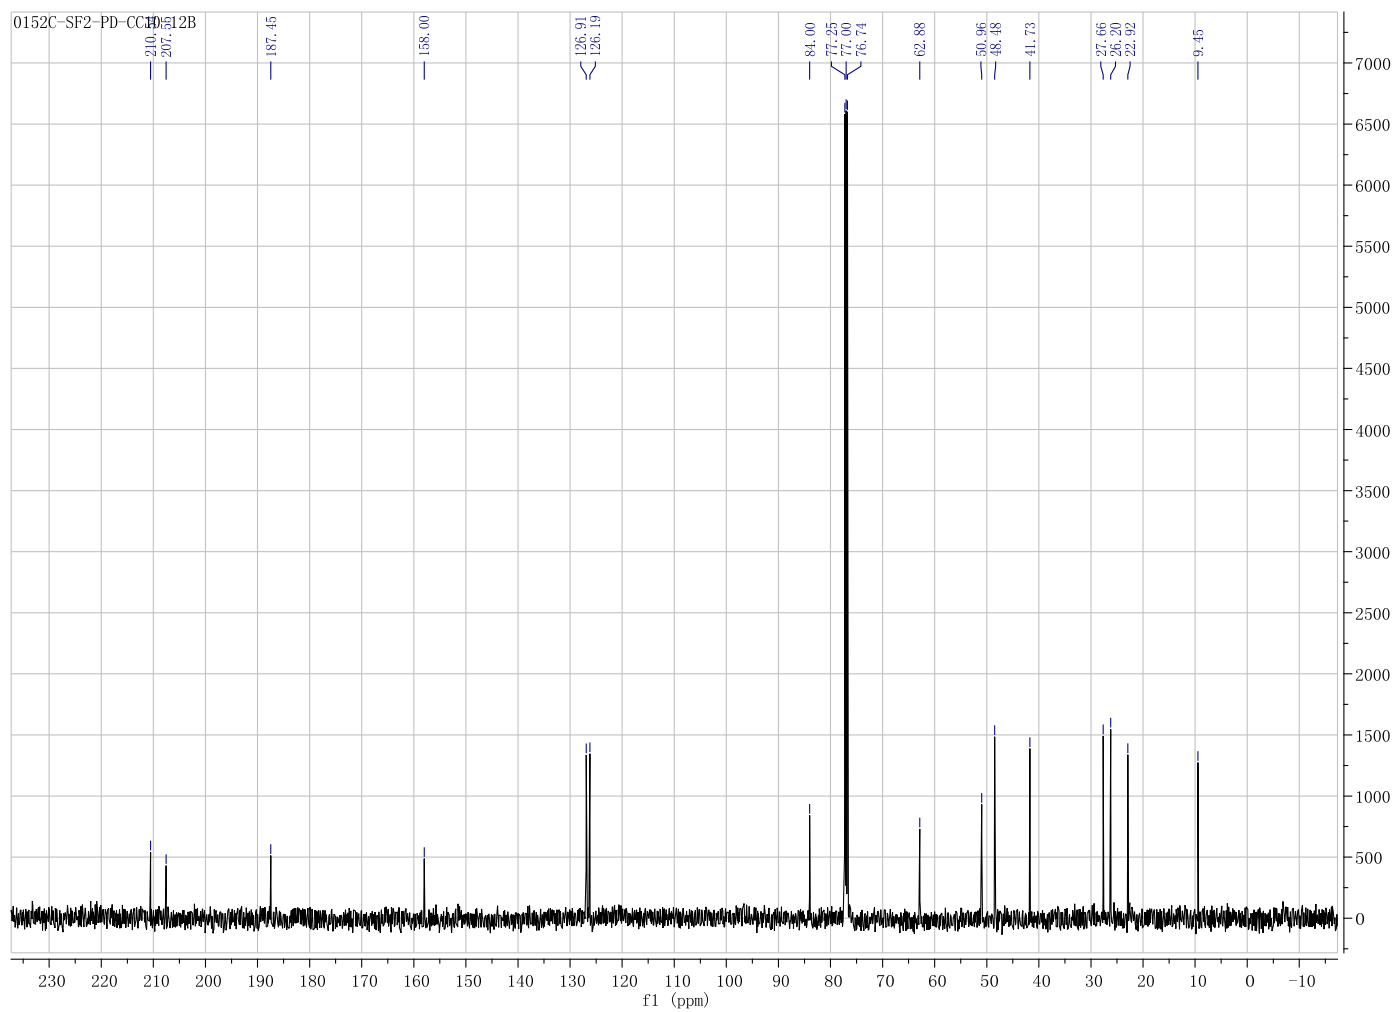

S10:  $^{13}\text{C}$  NMR (125 MHz,  $\text{CDCl}_3$ ) spectrum of chondrosterin B (2)

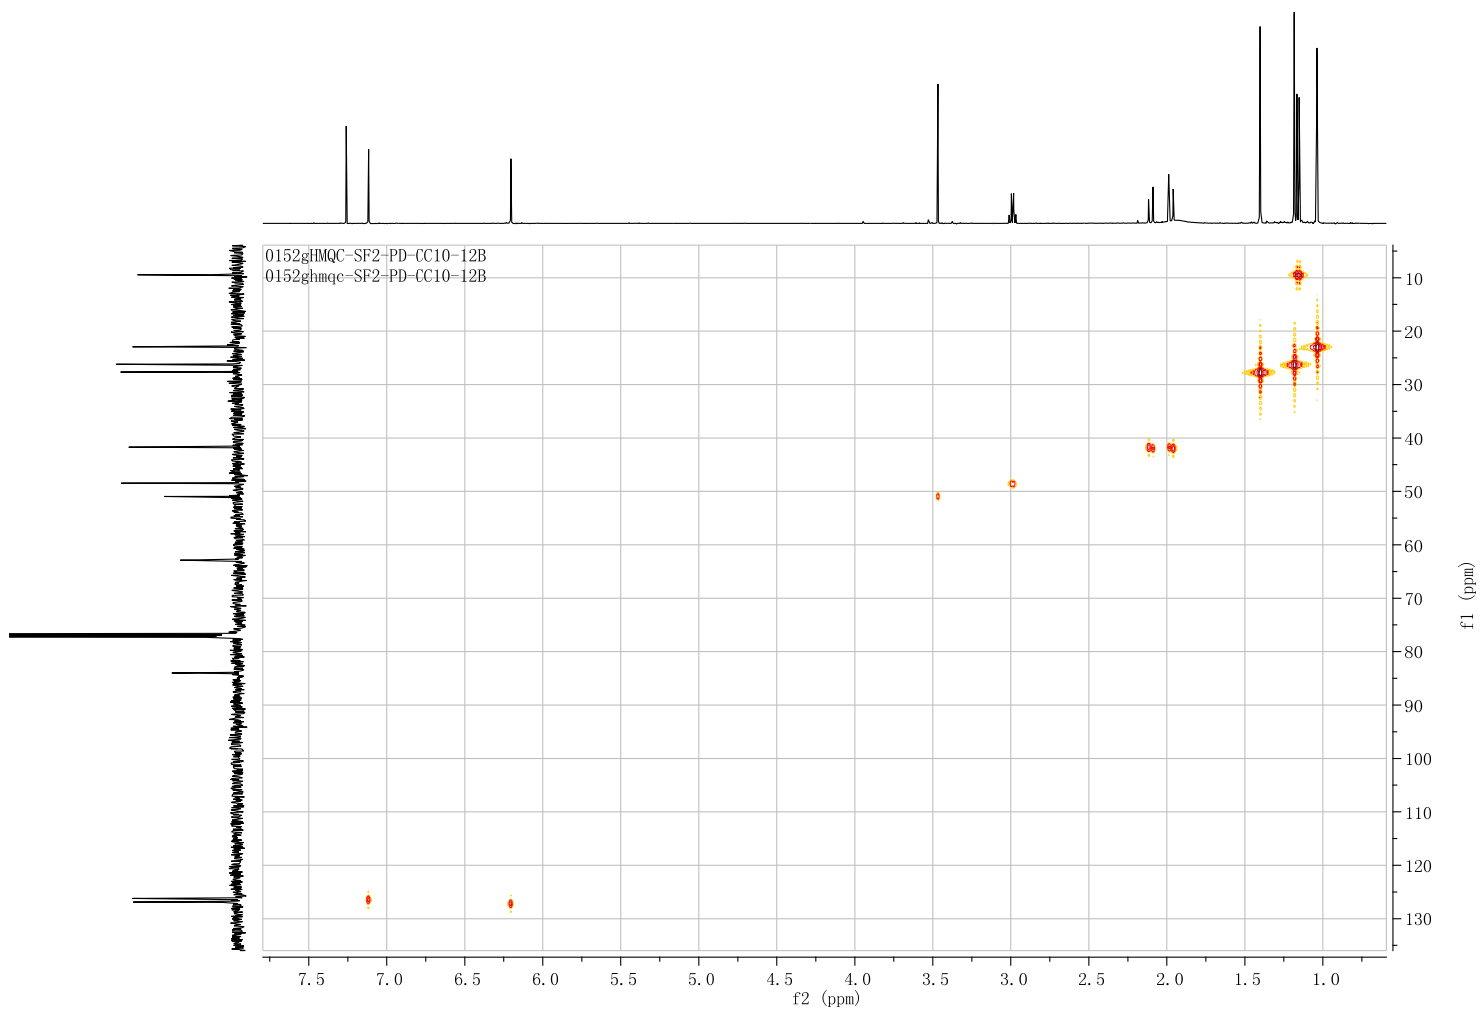

S11: gHMQC of chondrosterin B (2)

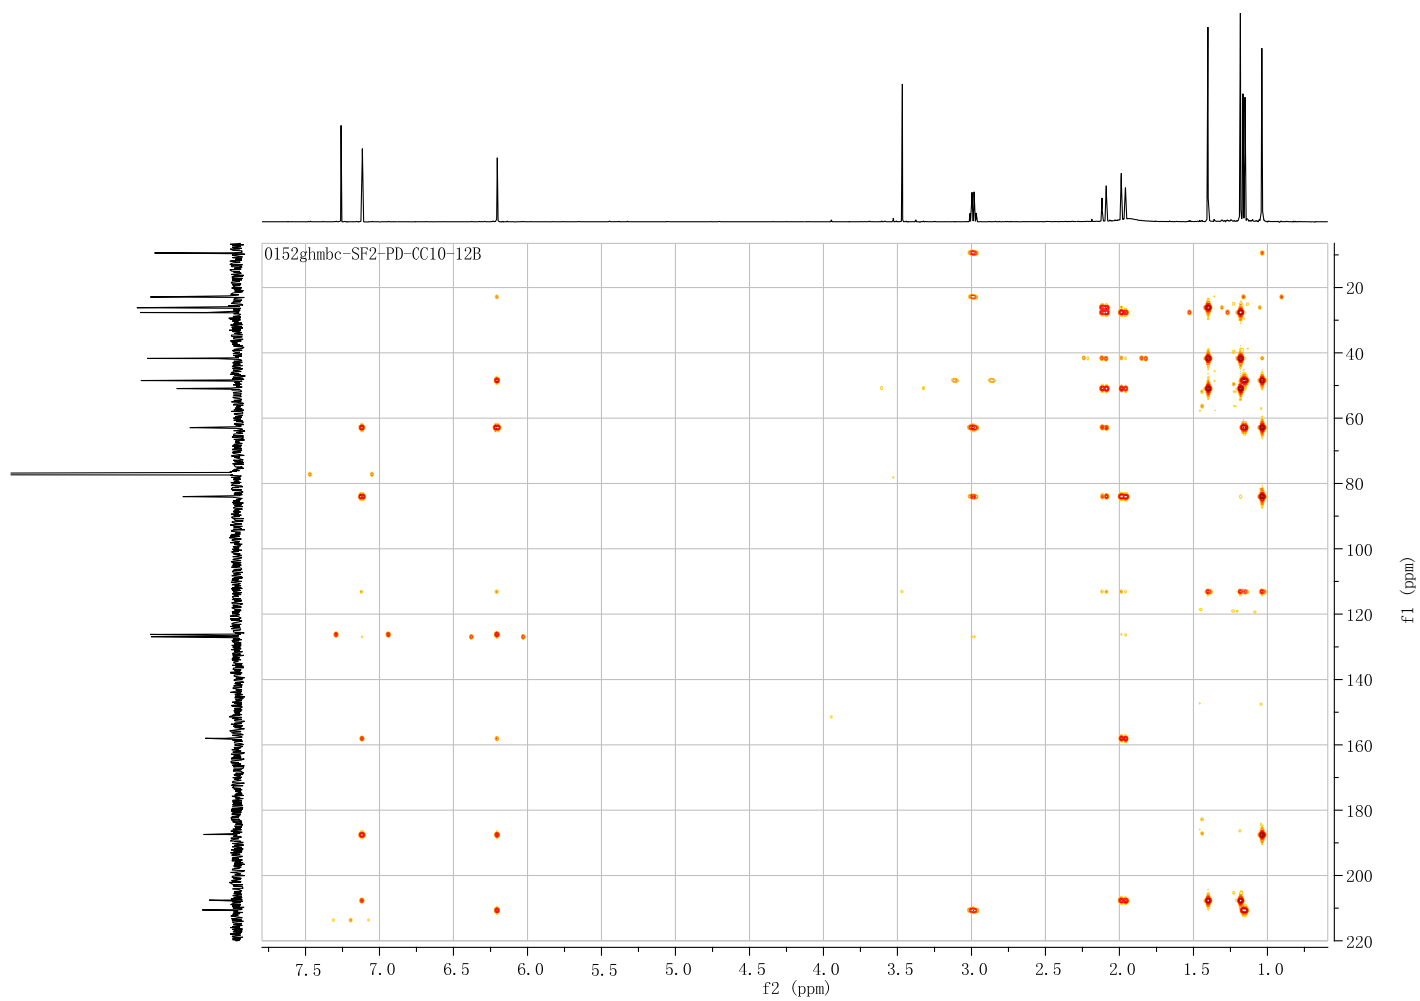

S12: gHMBC of chondrosterin B (2)

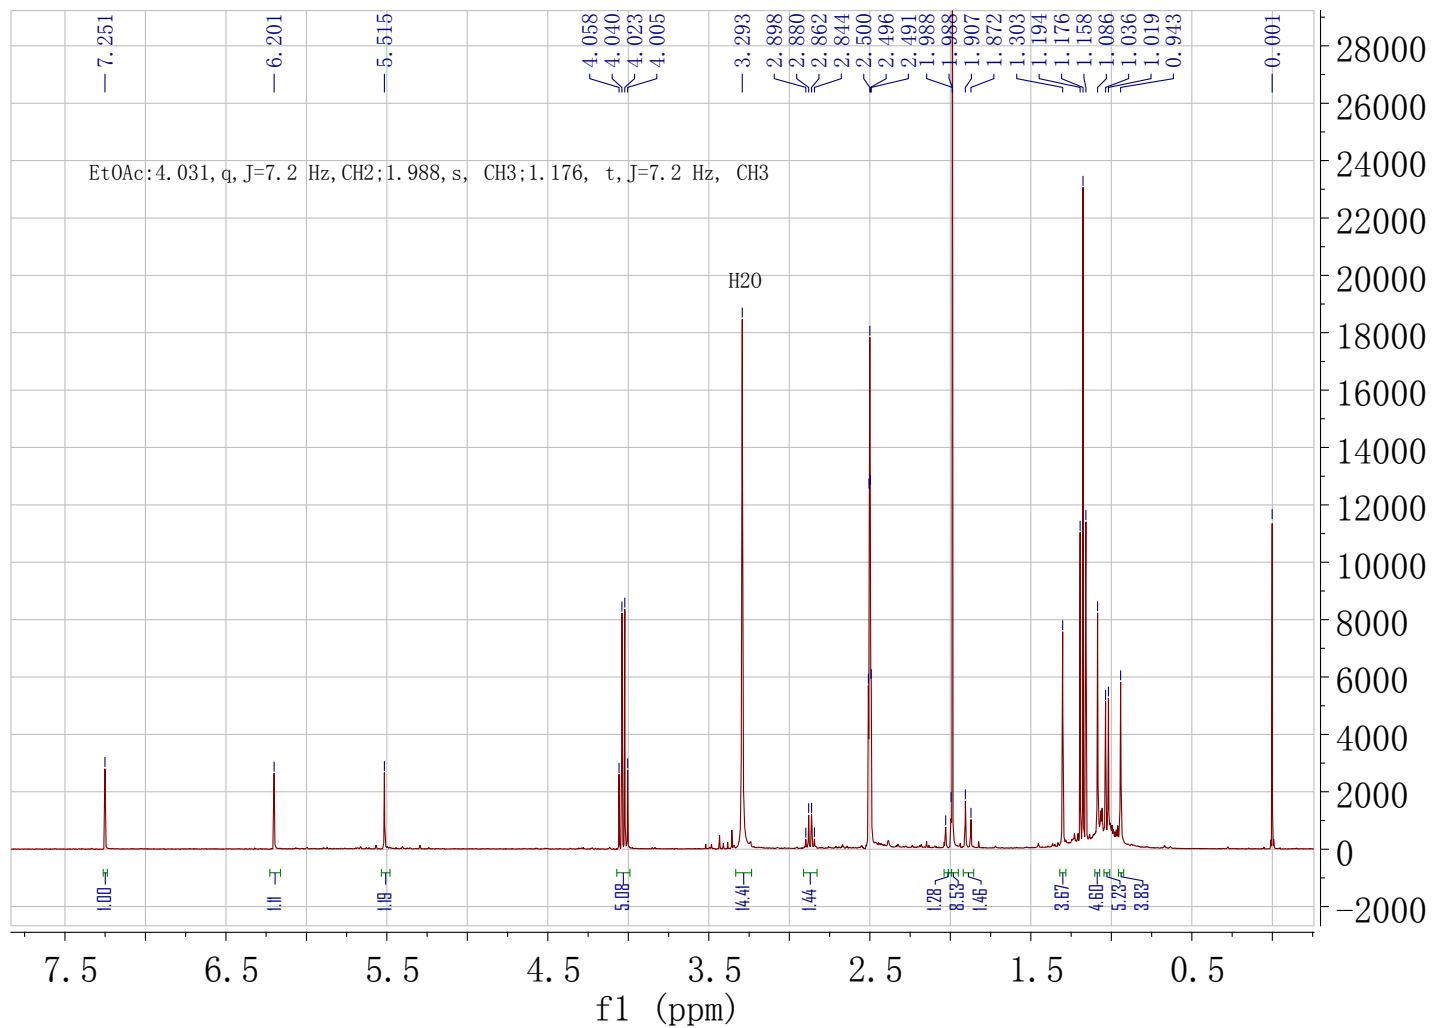

S13: <sup>1</sup>H NMR (400 MHz, [D<sub>6</sub>]DMSO) spectrum of chondrosterin B (2)

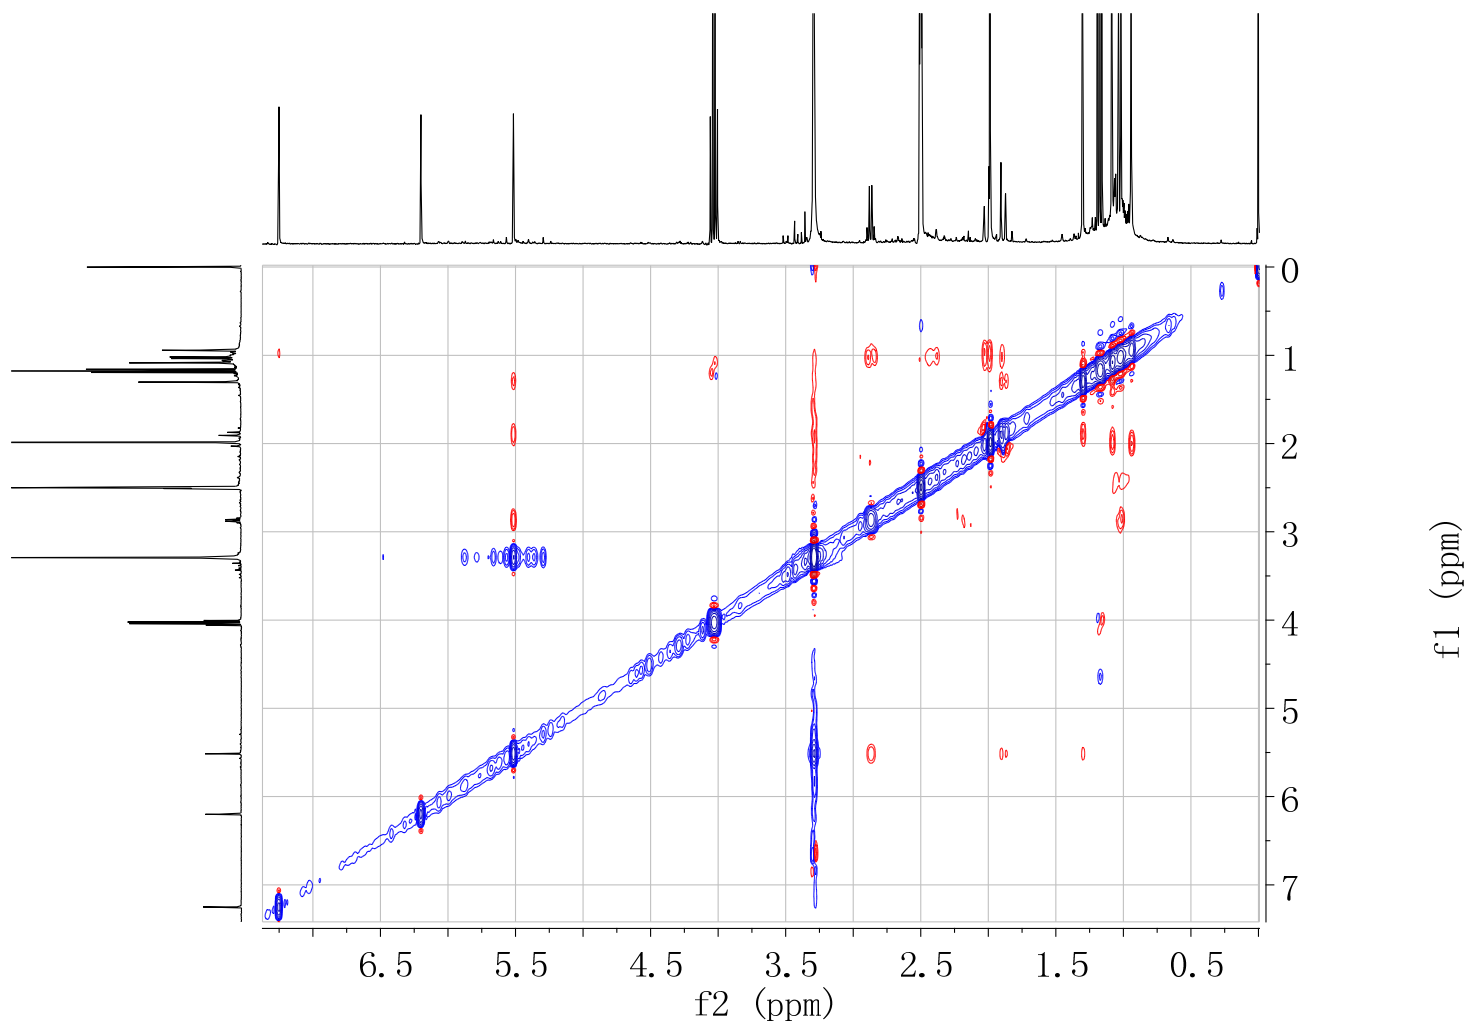

S14: ROESY of chondrosterin B (**2**) (400 MHz, [D6]DMSO)



Full ms [239.500 - 258.500 ] - Range: 248.000 - 248.300

Scan No. 13 of 18

Scan #: 13

RT: 0.51

Data points: 1

| Mass     | Relative Intensity | Theoretical Mass | Delta [ppm] | Delta [mmu] | RDB | Composition                                    |
|----------|--------------------|------------------|-------------|-------------|-----|------------------------------------------------|
| 248.1405 | 100.0              | 248.1407         | -0.9        | -0.2        | 6.0 | C <sub>15</sub> H <sub>20</sub> O <sub>3</sub> |

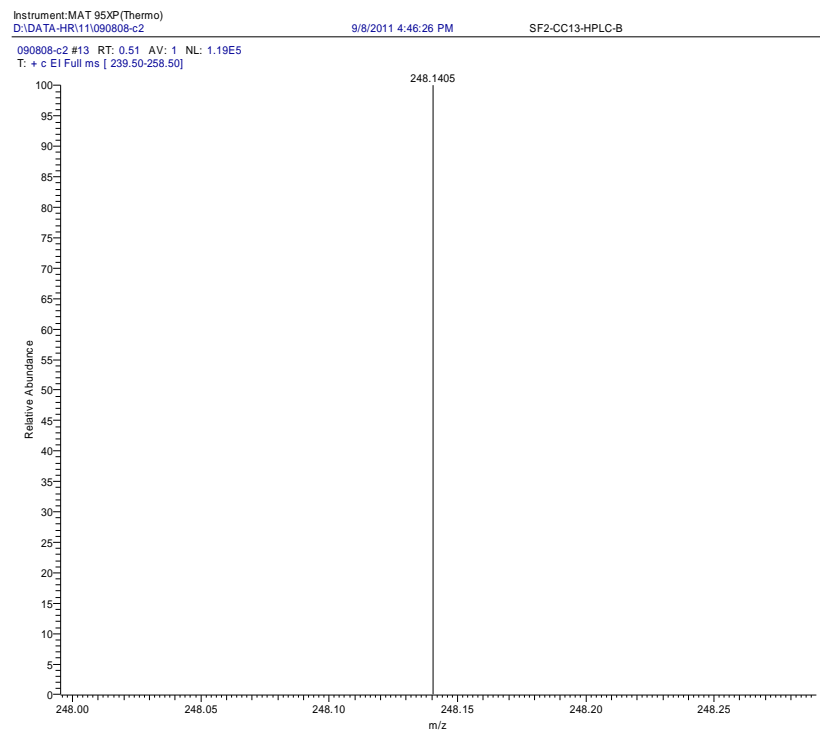

S15: HREIMS of chondrosterin C (3)

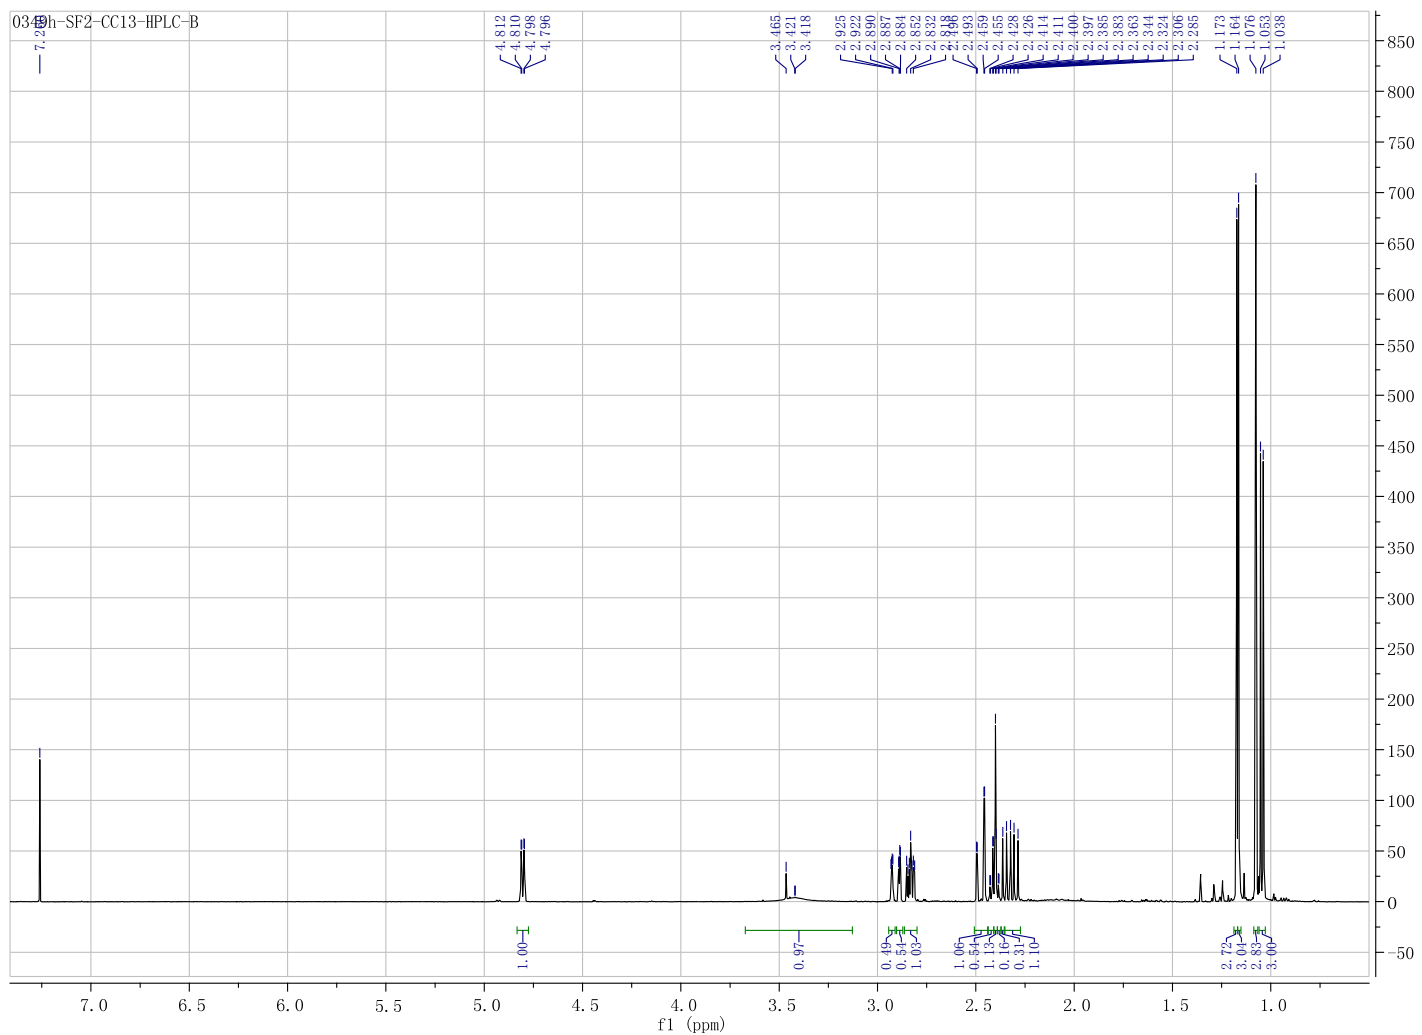

S16: <sup>1</sup>H NMR (500 MHz, CDCl<sub>3</sub>) spectrum of chondrosterin C (**3**)

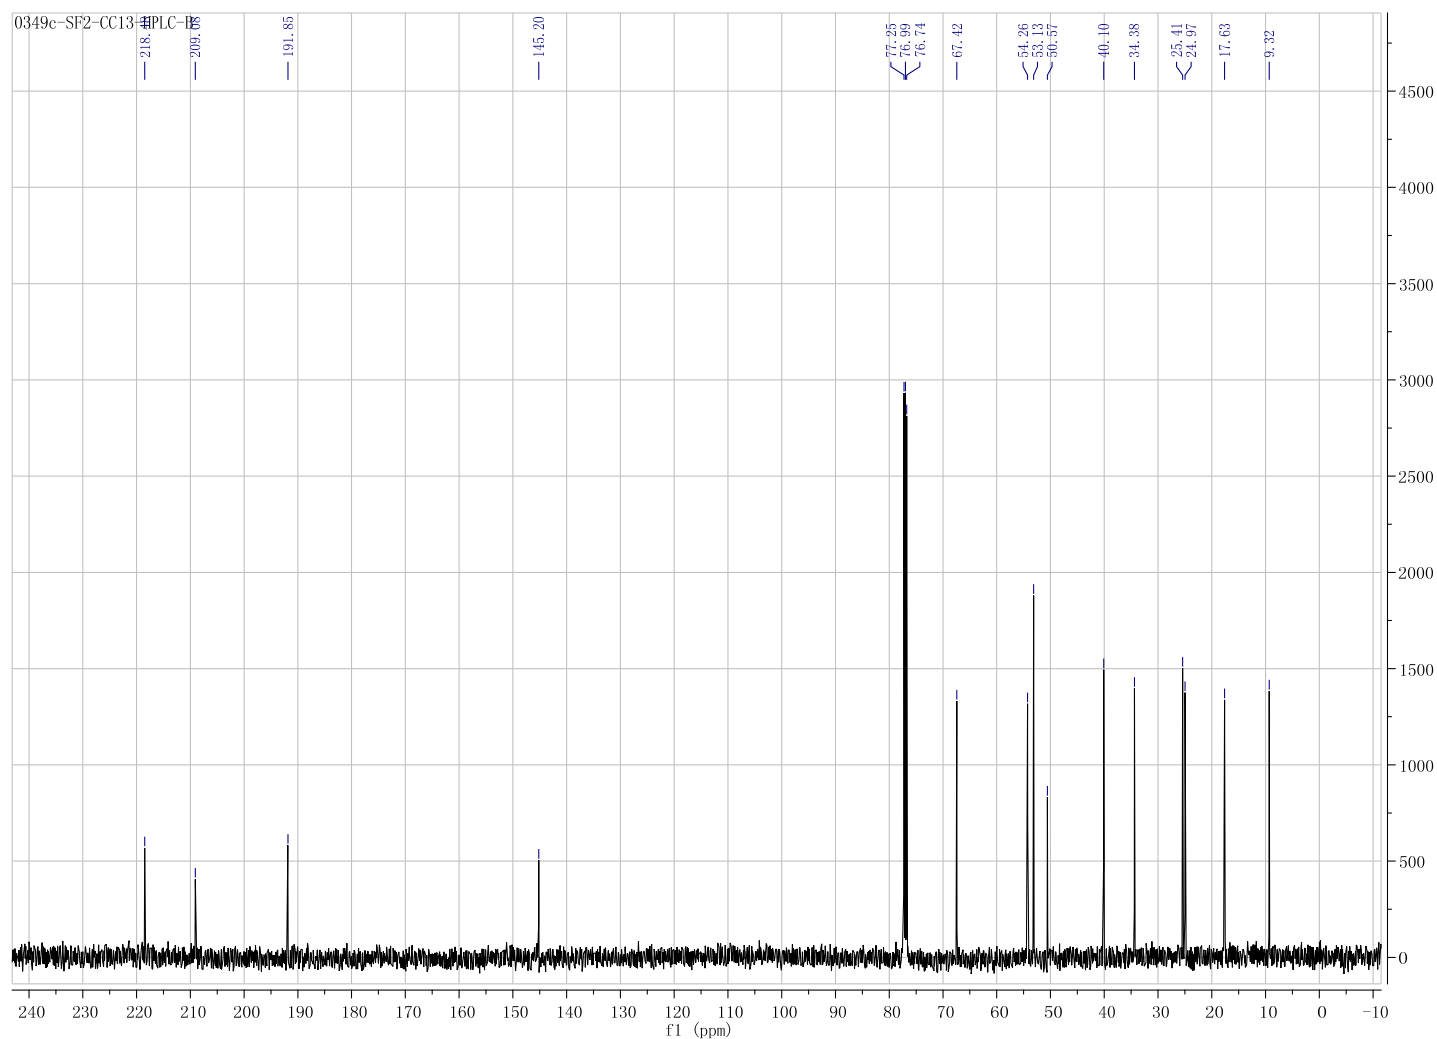

S17: <sup>13</sup>C NMR (125 MHz, CDCl<sub>3</sub>) spectrum of chondrosterin C (**3**)

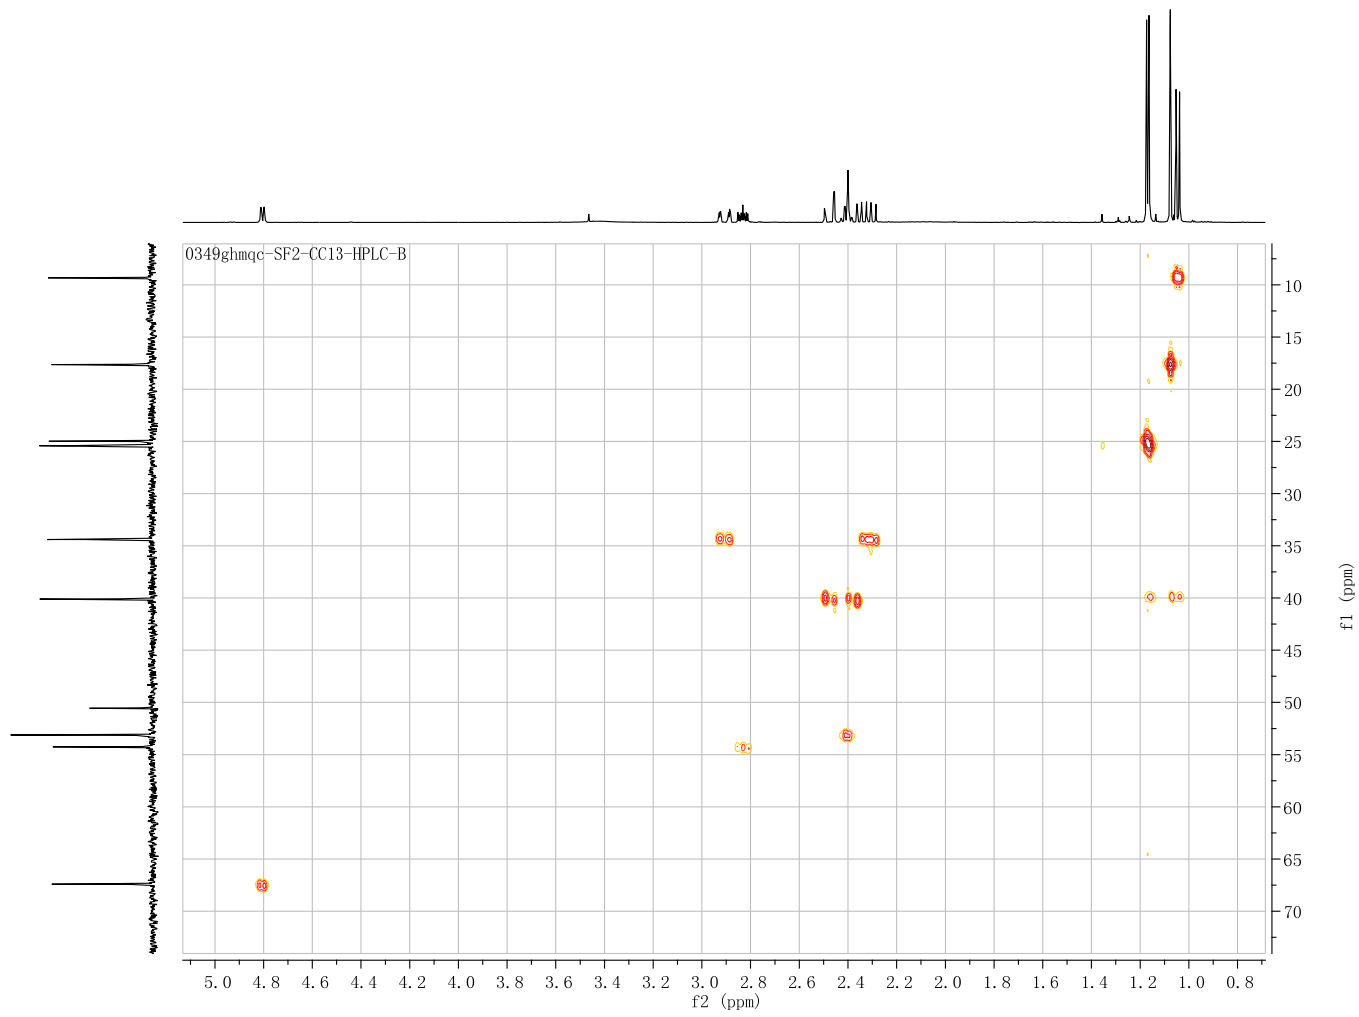

S18: gHMQC of chondrosterin C (3)

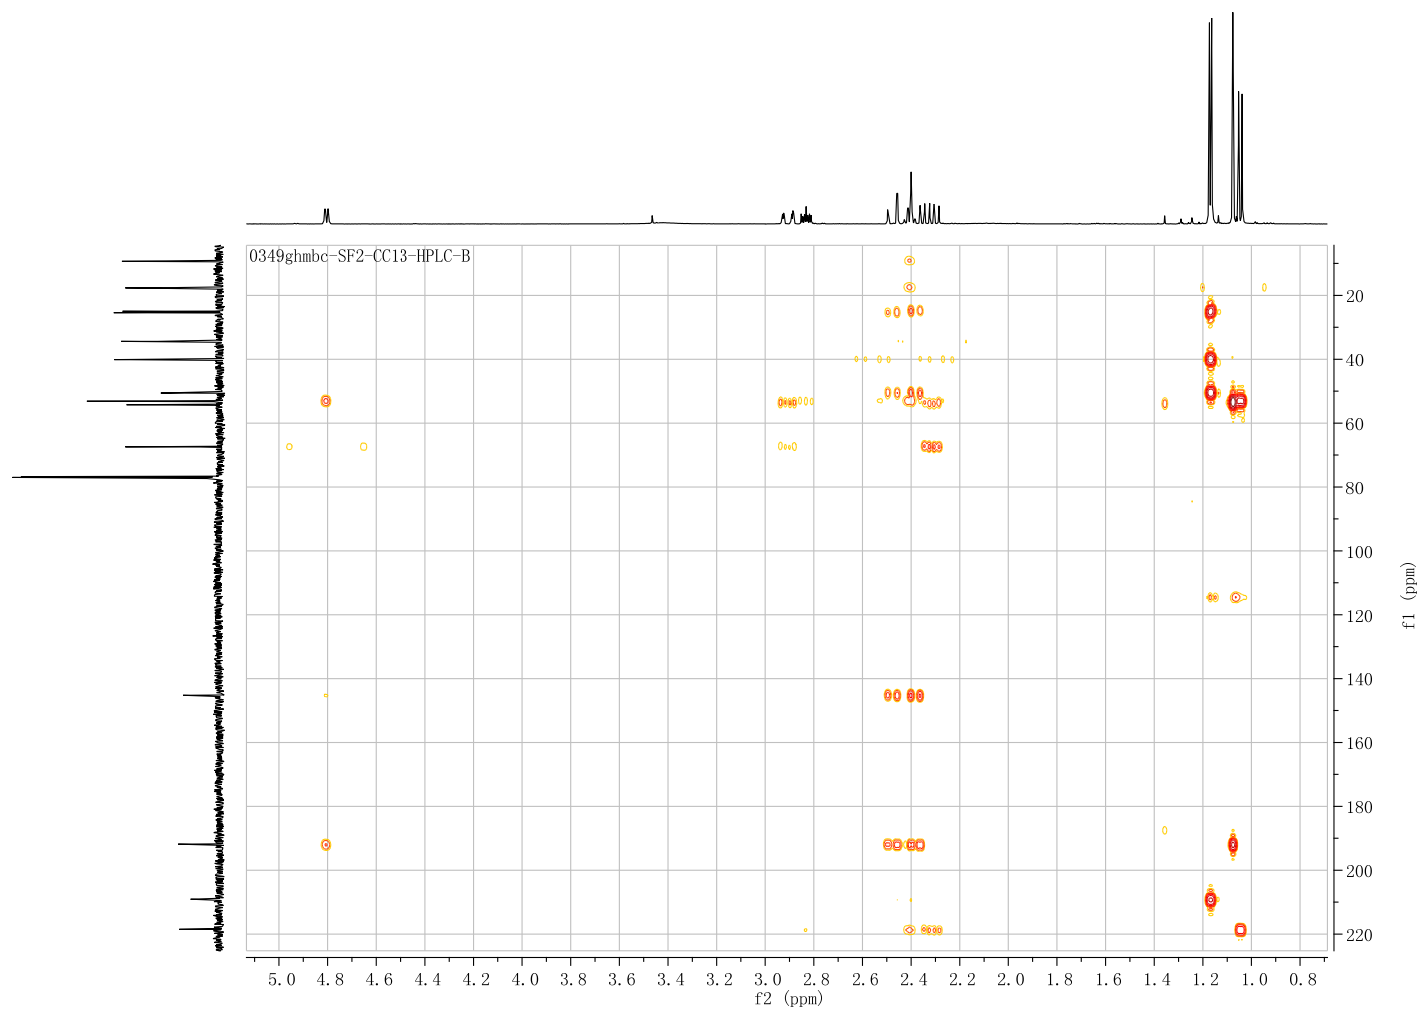

S19: gHMBC of chondrosterin C (3)

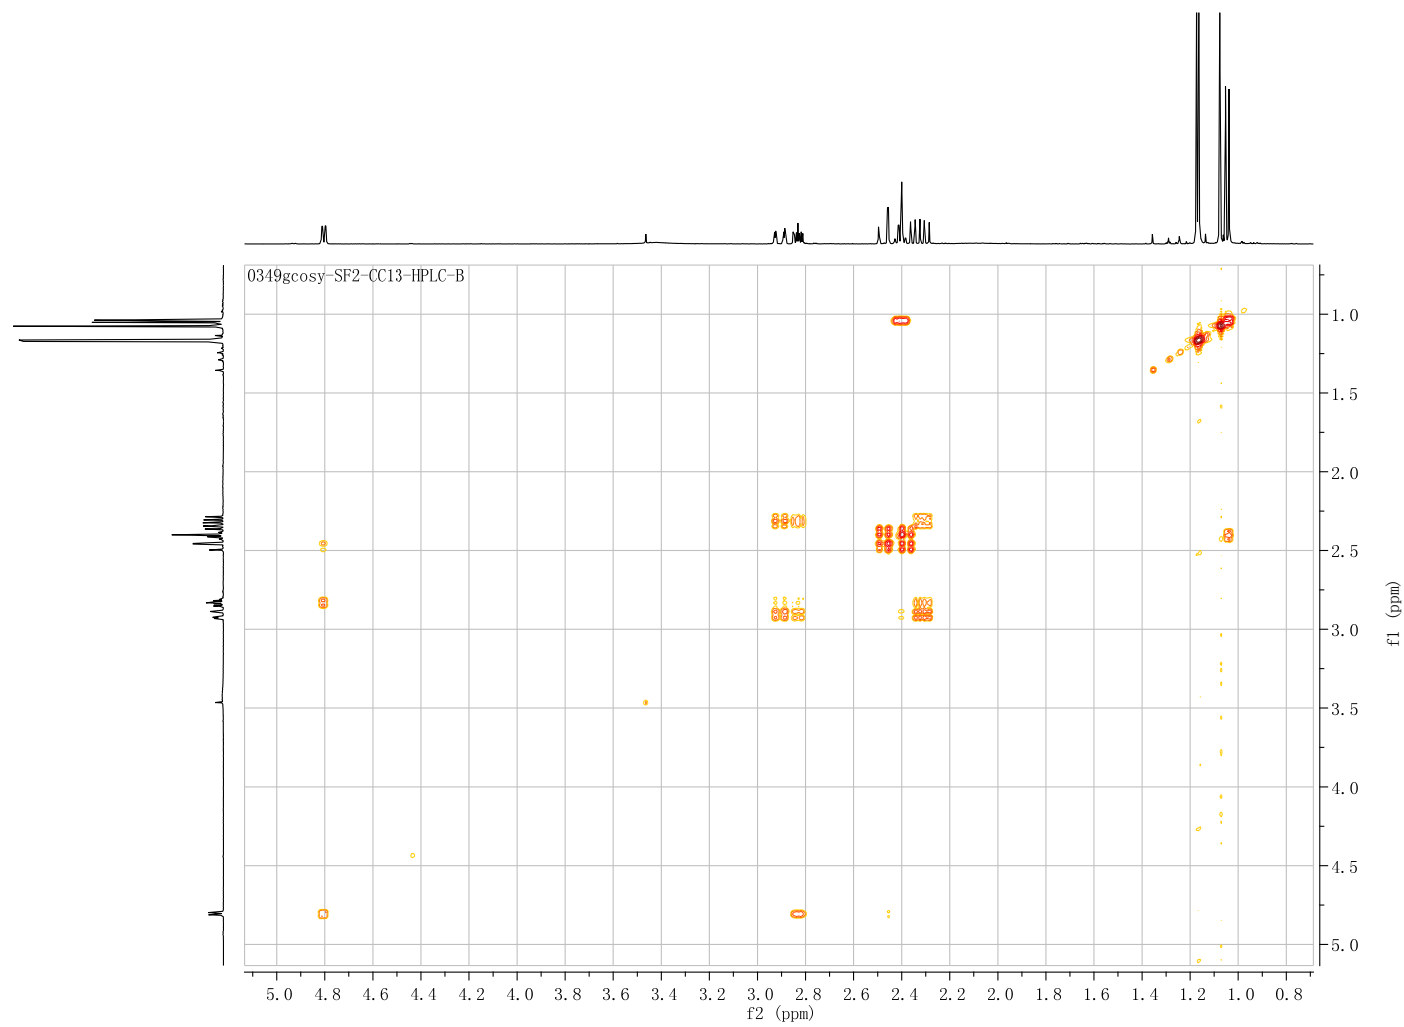

S20:  $^1\text{H}$ - $^1\text{H}$  gCOSY of chondrosterin C (**3**)

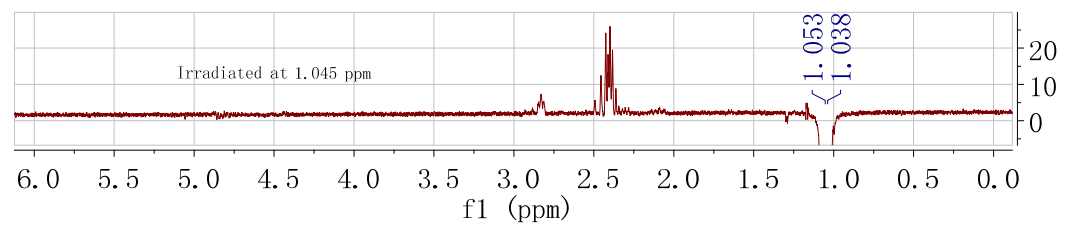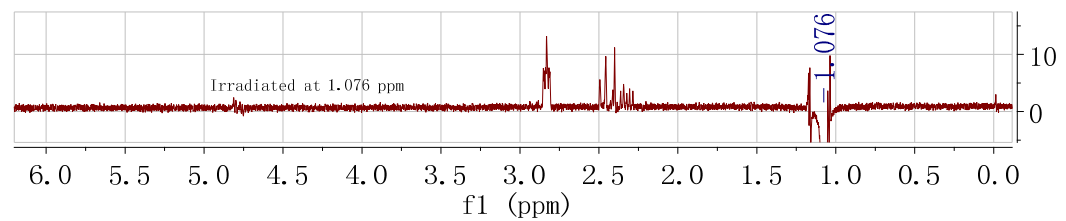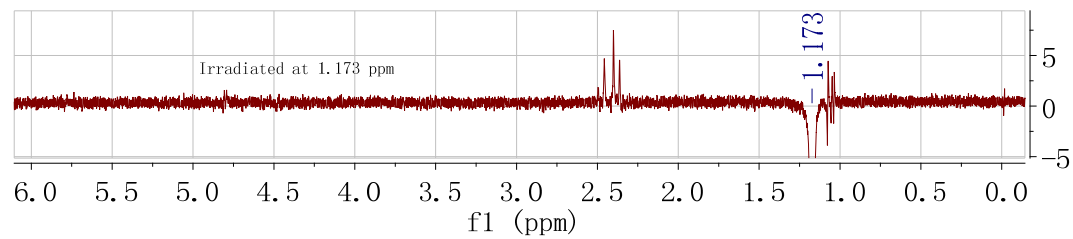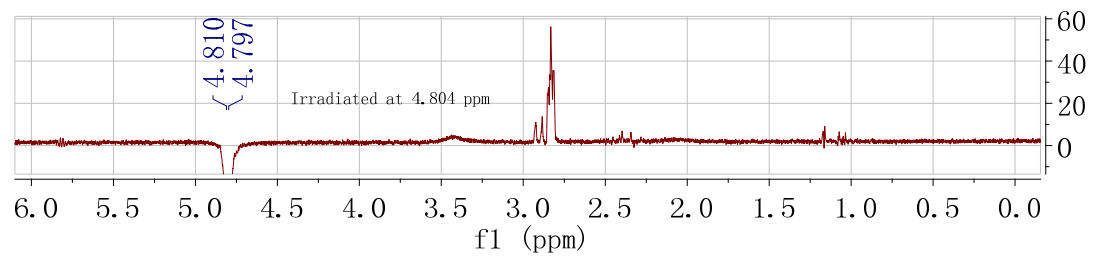

S21: NOE of chondrosterin C (**3**)

Full ms [242.100 - 255.700 ] - Range: 242.100 - 255.700

Scan No. 5 of 18

Scan #: 5

RT: 0.24

Data points: 1

| Mass     | Relative Intensity | Theoretical Mass | Delta[ppm] | Delta[mmu] | RDB | Composition                                        |
|----------|--------------------|------------------|------------|------------|-----|----------------------------------------------------|
| 246.1255 | 100.0              | 246.1250         |            | 1.9        | 0.5 | 7.0 C <sub>15</sub> H <sub>18</sub> O <sub>3</sub> |

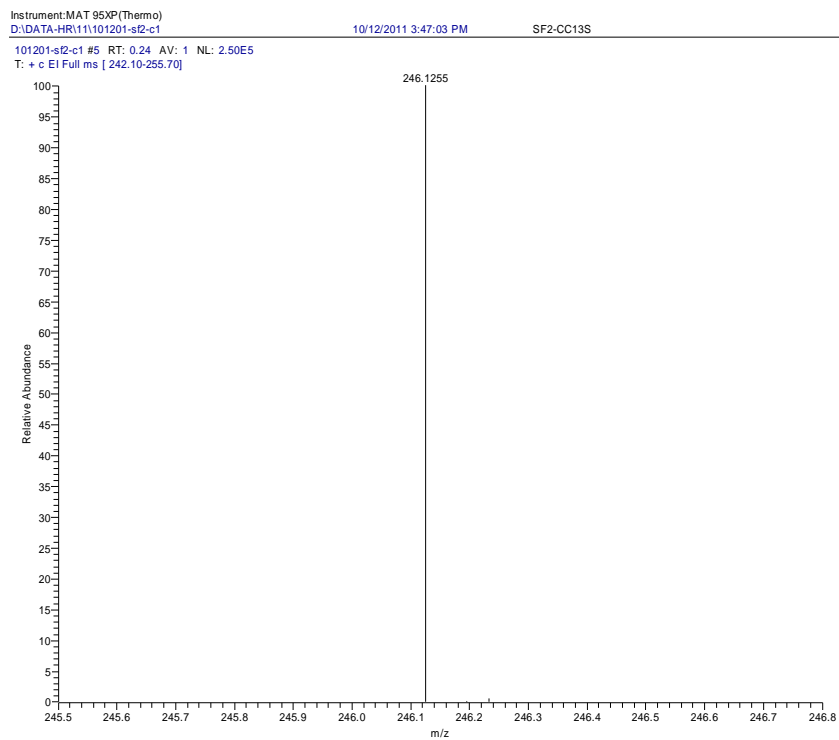

S22: HREIMS of chondrosterin D (4)



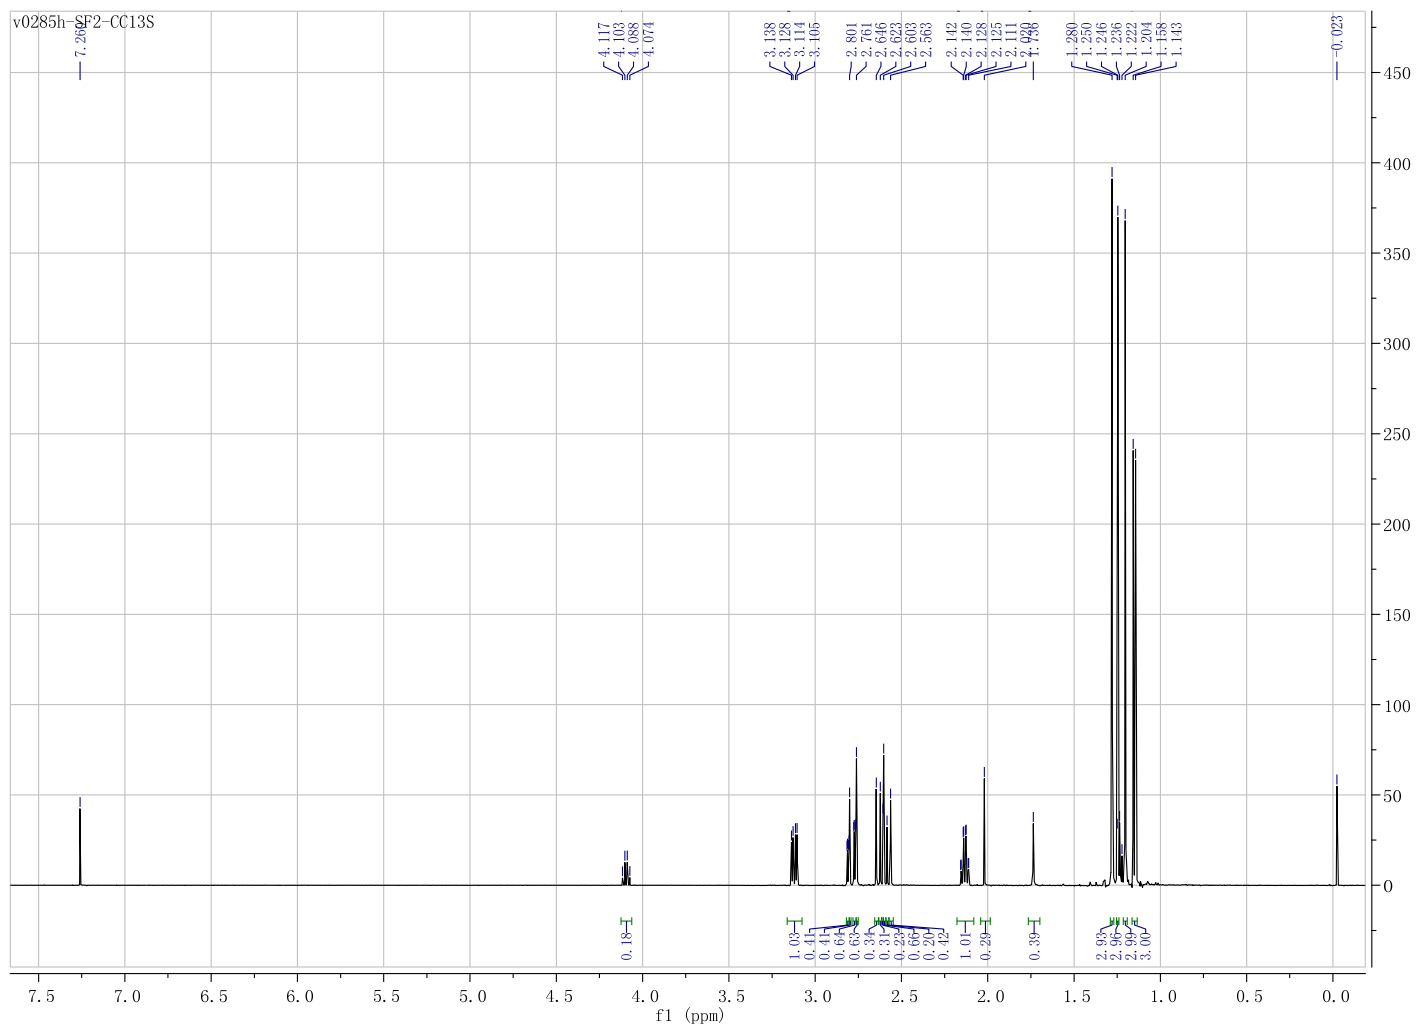

S23:  $^1\text{H}$  NMR (500 MHz,  $\text{CDCl}_3$ ) spectrum of chondrosterin D (**4**)

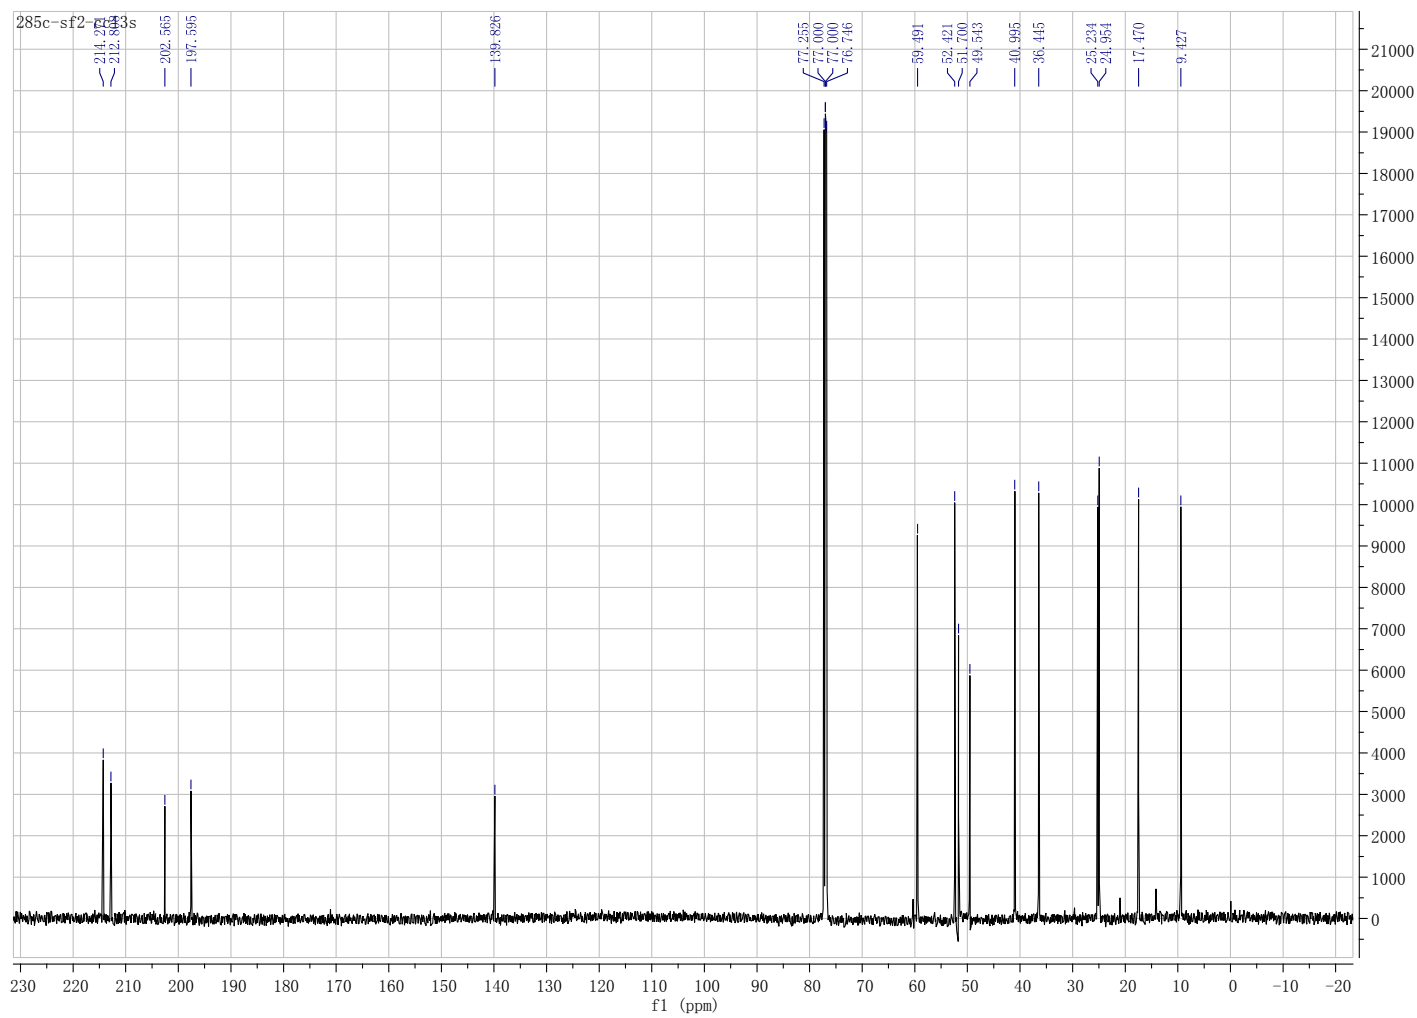

S24:  $^{13}\text{C}$  NMR (125 MHz,  $\text{CDCl}_3$ ) spectrum of chondrosterin D (**4**)

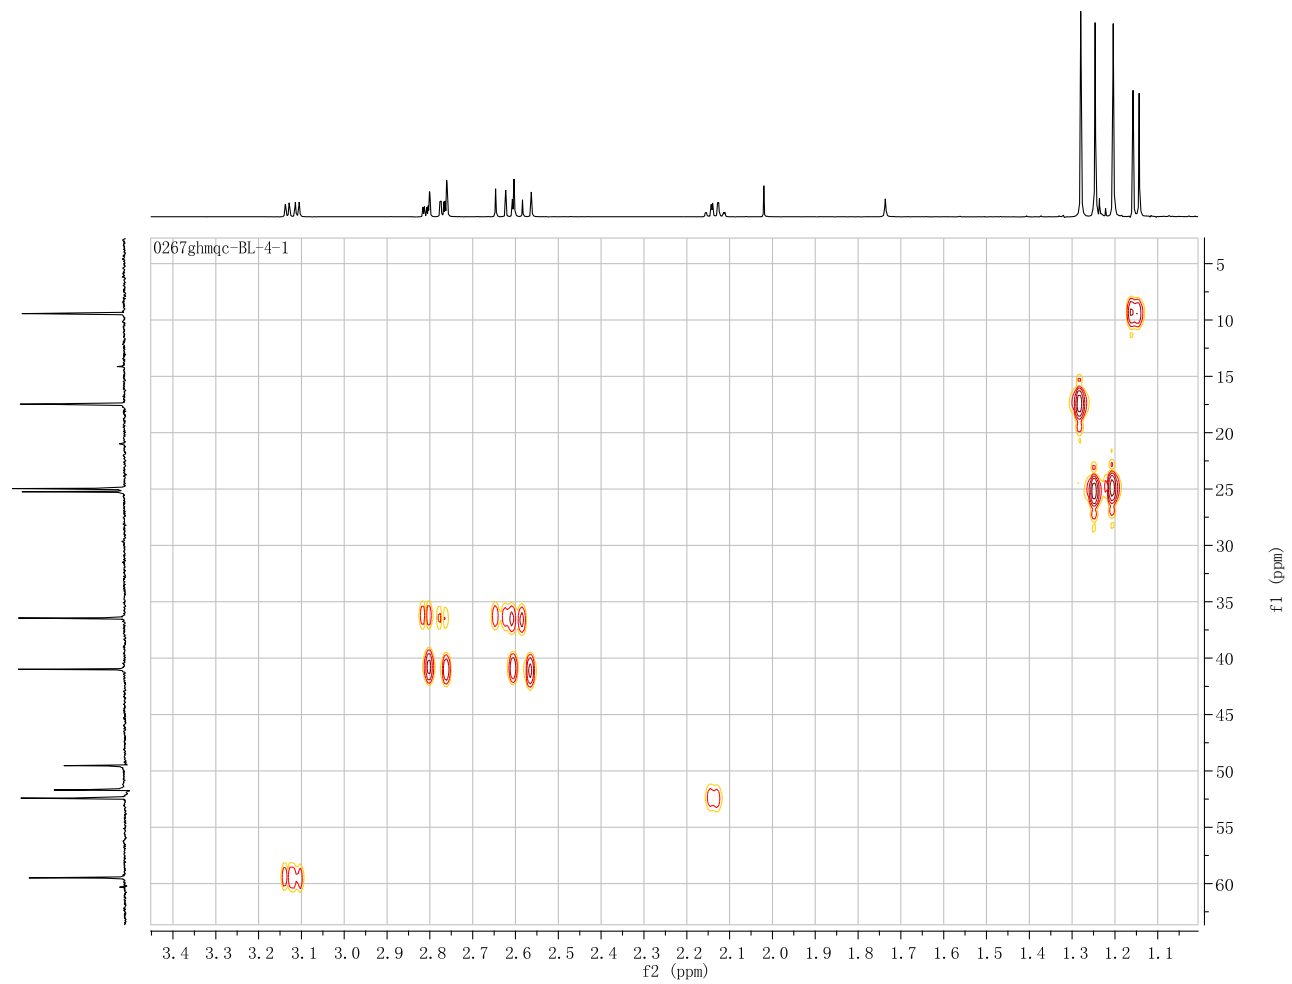

S25: gHMOC of chondrosterin D (4)

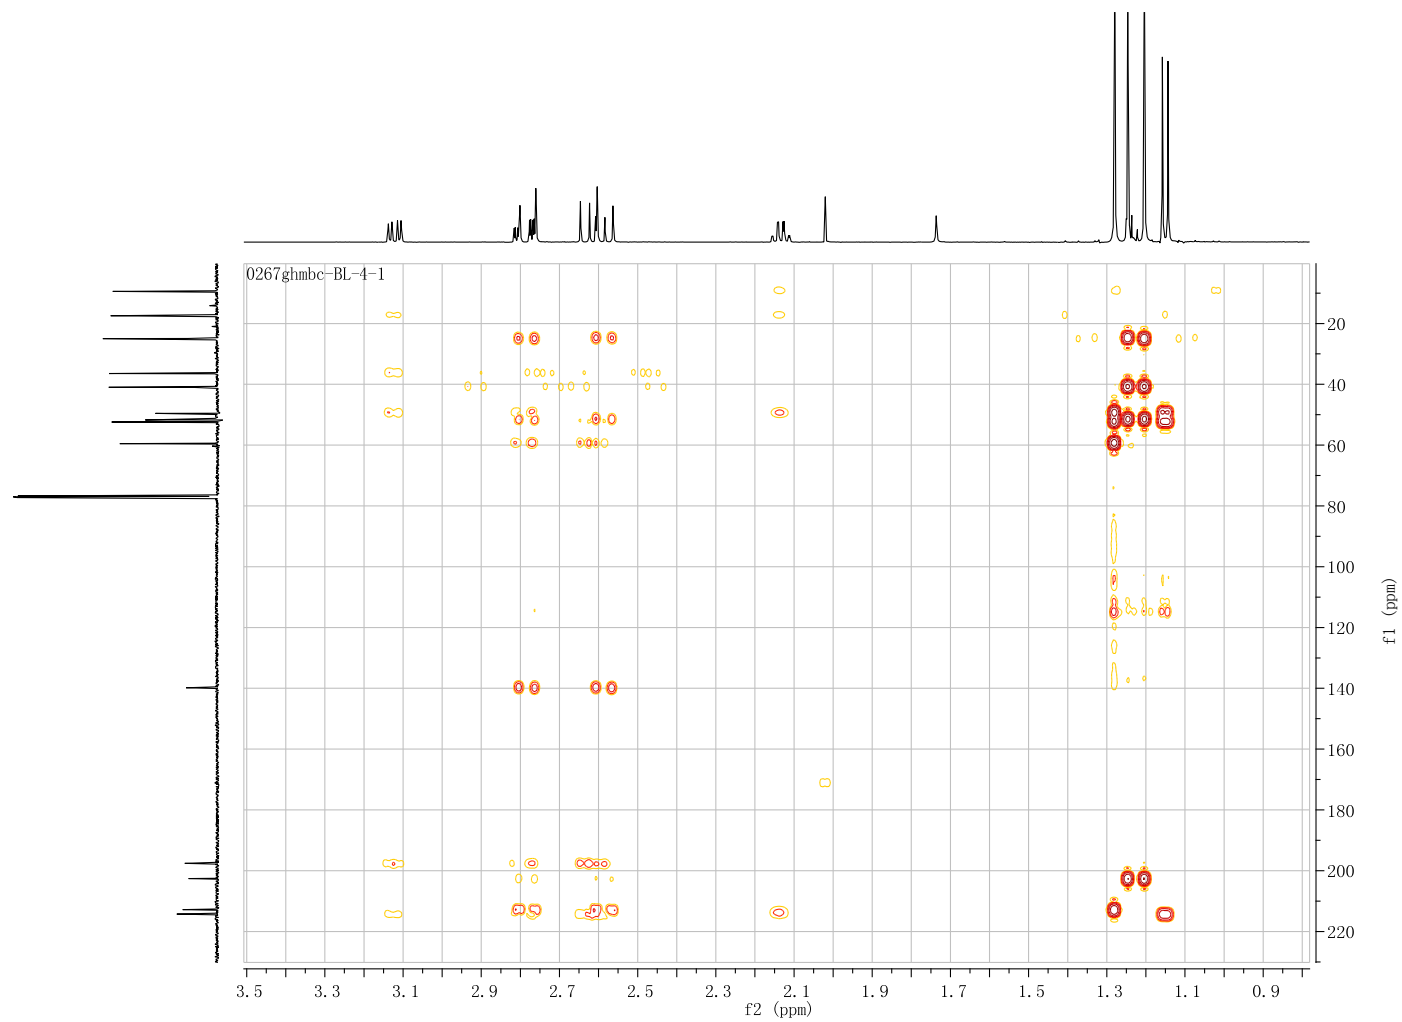

S26: gHMBC of chondrosterin D (4)

Full ms [227.500 - 246.500 ] - Range: 234.000 - 234.500

Scan No. 12 of 14

Scan #: 12

RT: 0.46

Data points: 1

| Mass     | Relative Intensity | Theoretical Mass | Delta[ppm] | Delta[mmu] | RDB  | Composition                                        |
|----------|--------------------|------------------|------------|------------|------|----------------------------------------------------|
| 234.1613 | 65.5               | 234.1614         |            | -0.4       | -0.1 | 5.0 C <sub>15</sub> H <sub>22</sub> O <sub>2</sub> |

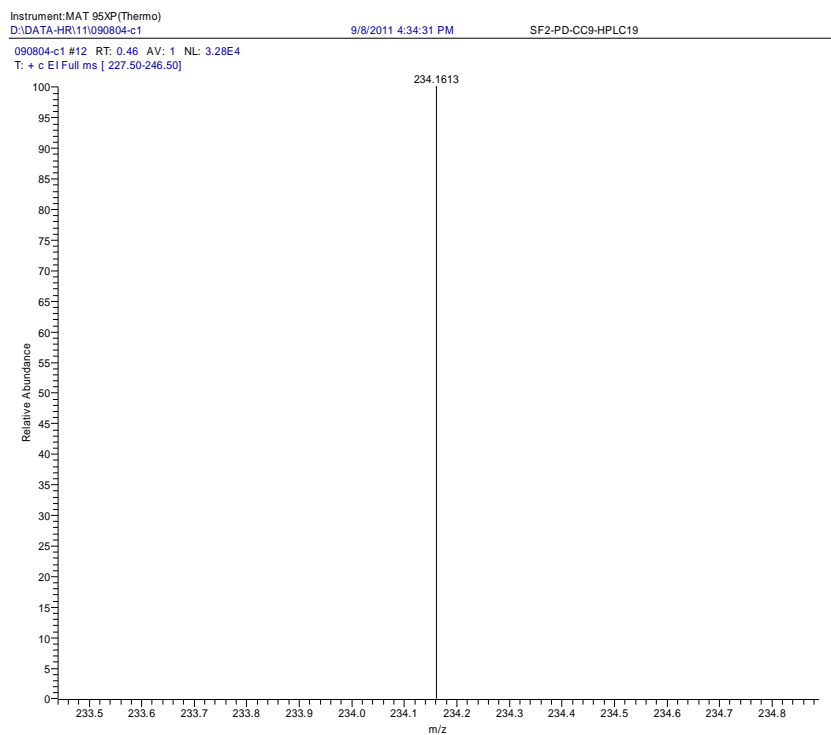

S27: HREIMS of chondrosterin E (5)

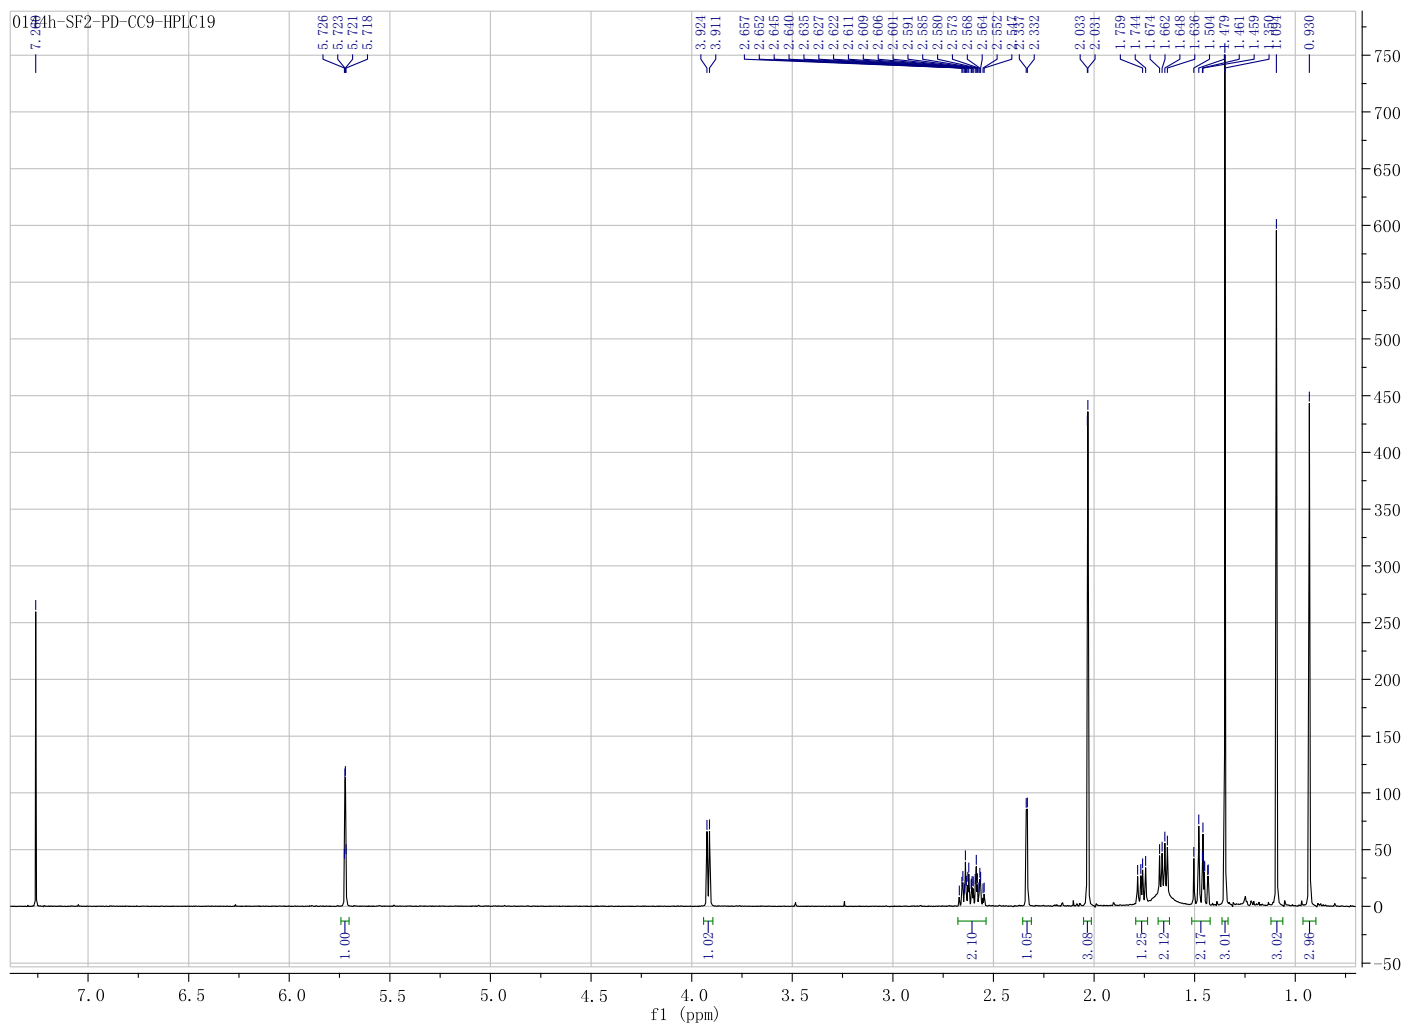

S28: <sup>1</sup>H NMR (500 MHz, CDCl<sub>3</sub>) spectrum of chondrosterin E (5)

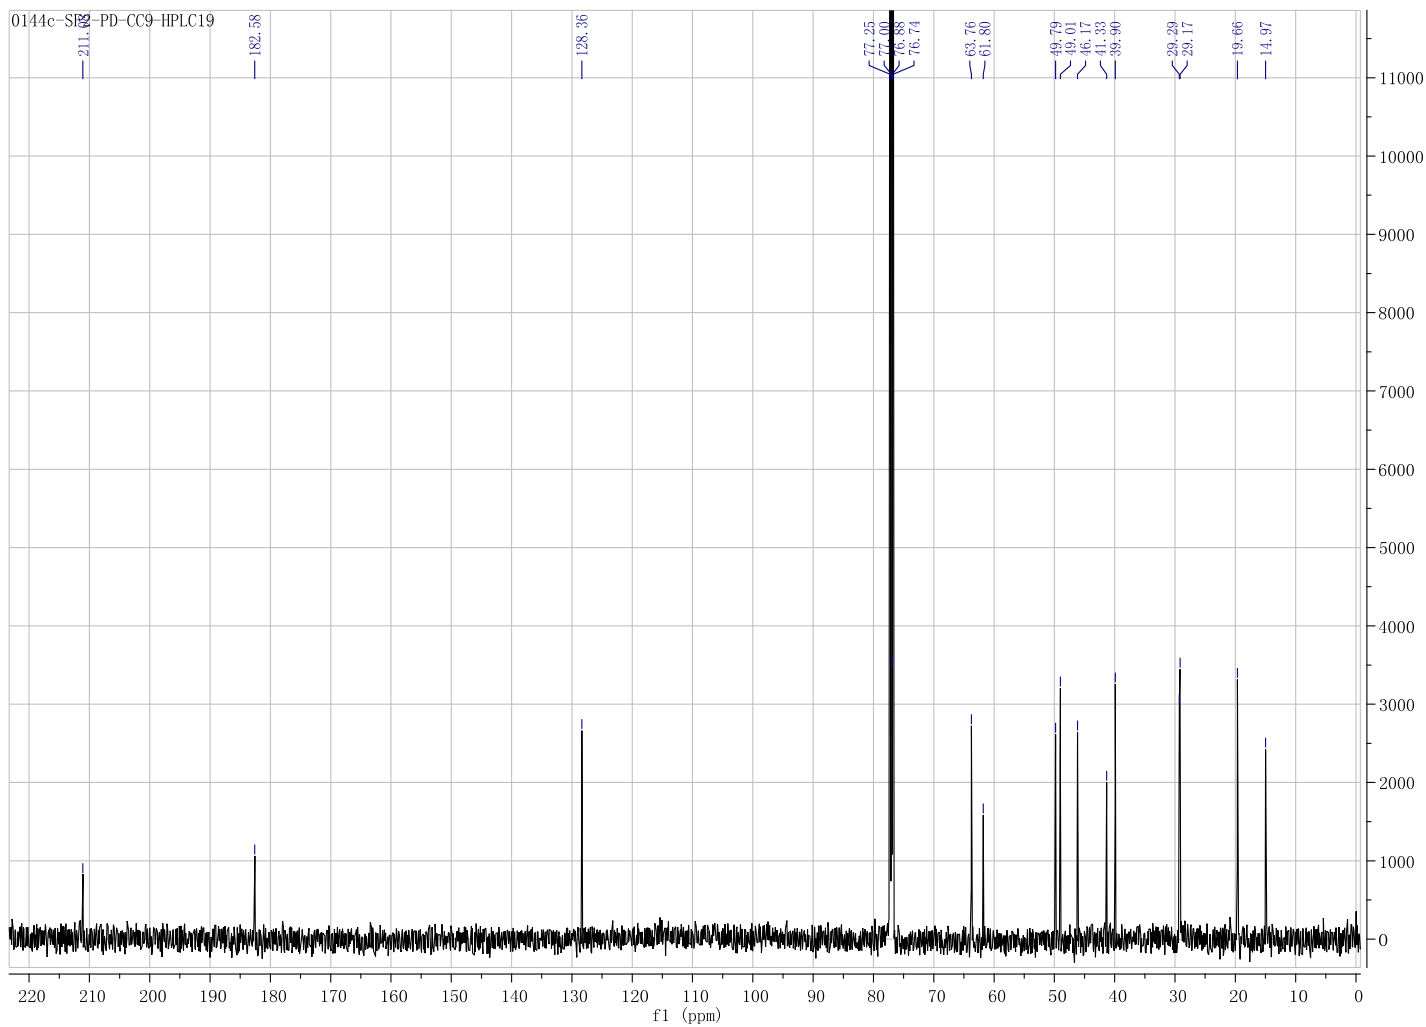

S29:  $^{13}\text{C}$  NMR (125 MHz,  $\text{CDCl}_3$ ) spectrum of chondrosterin E (**5**)

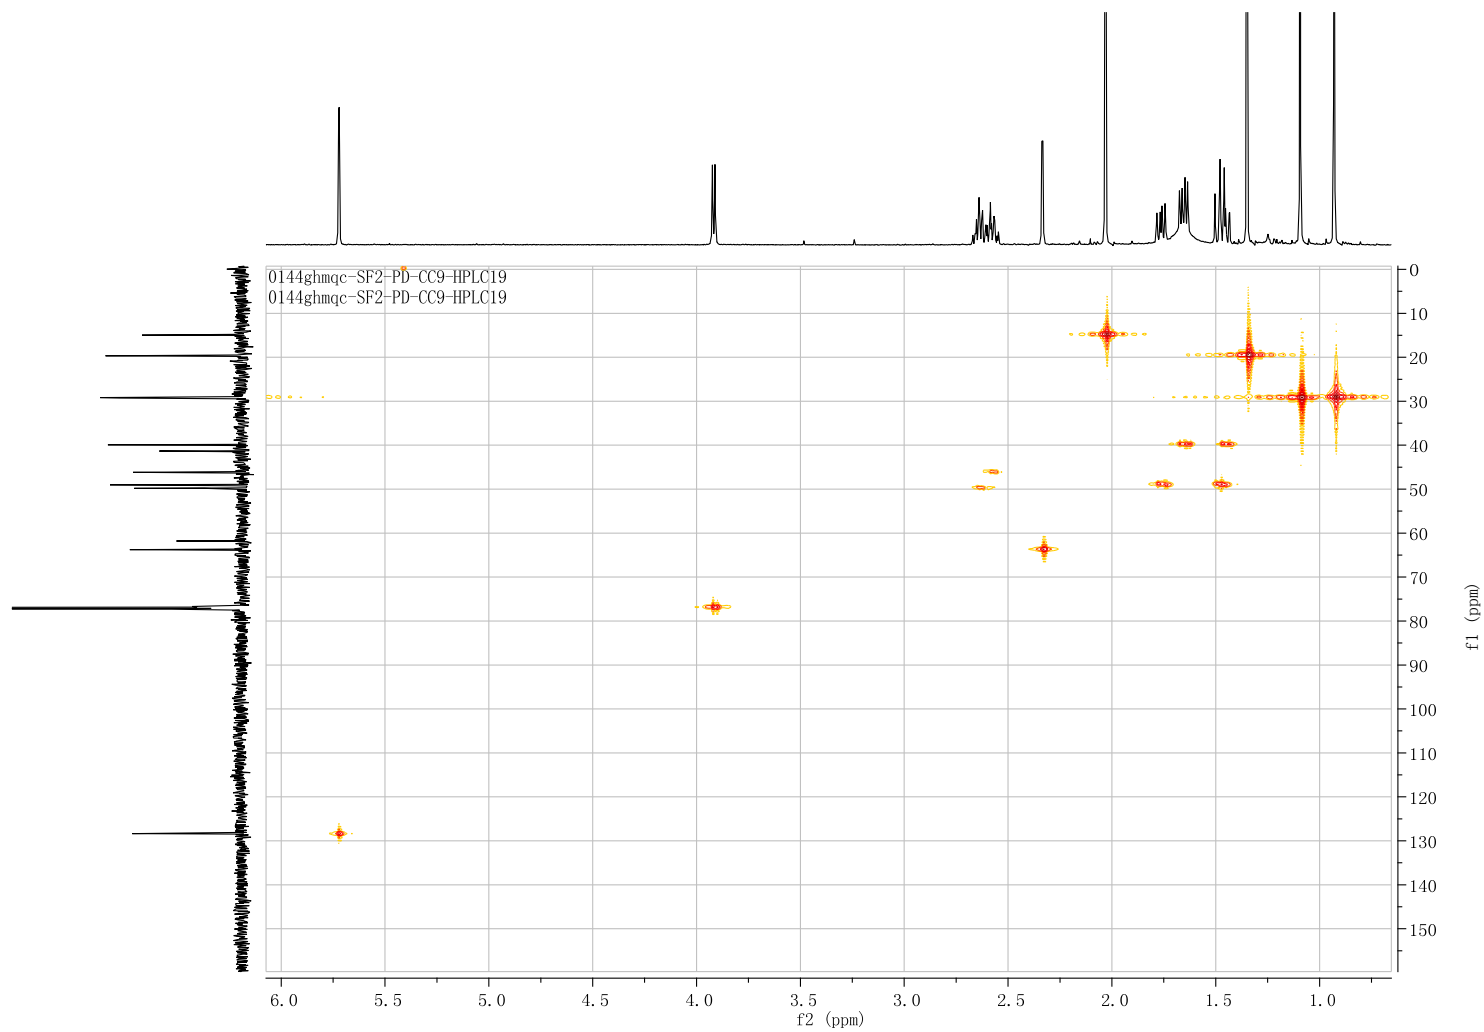

S30: gHMQC of chondrosterin E (5)



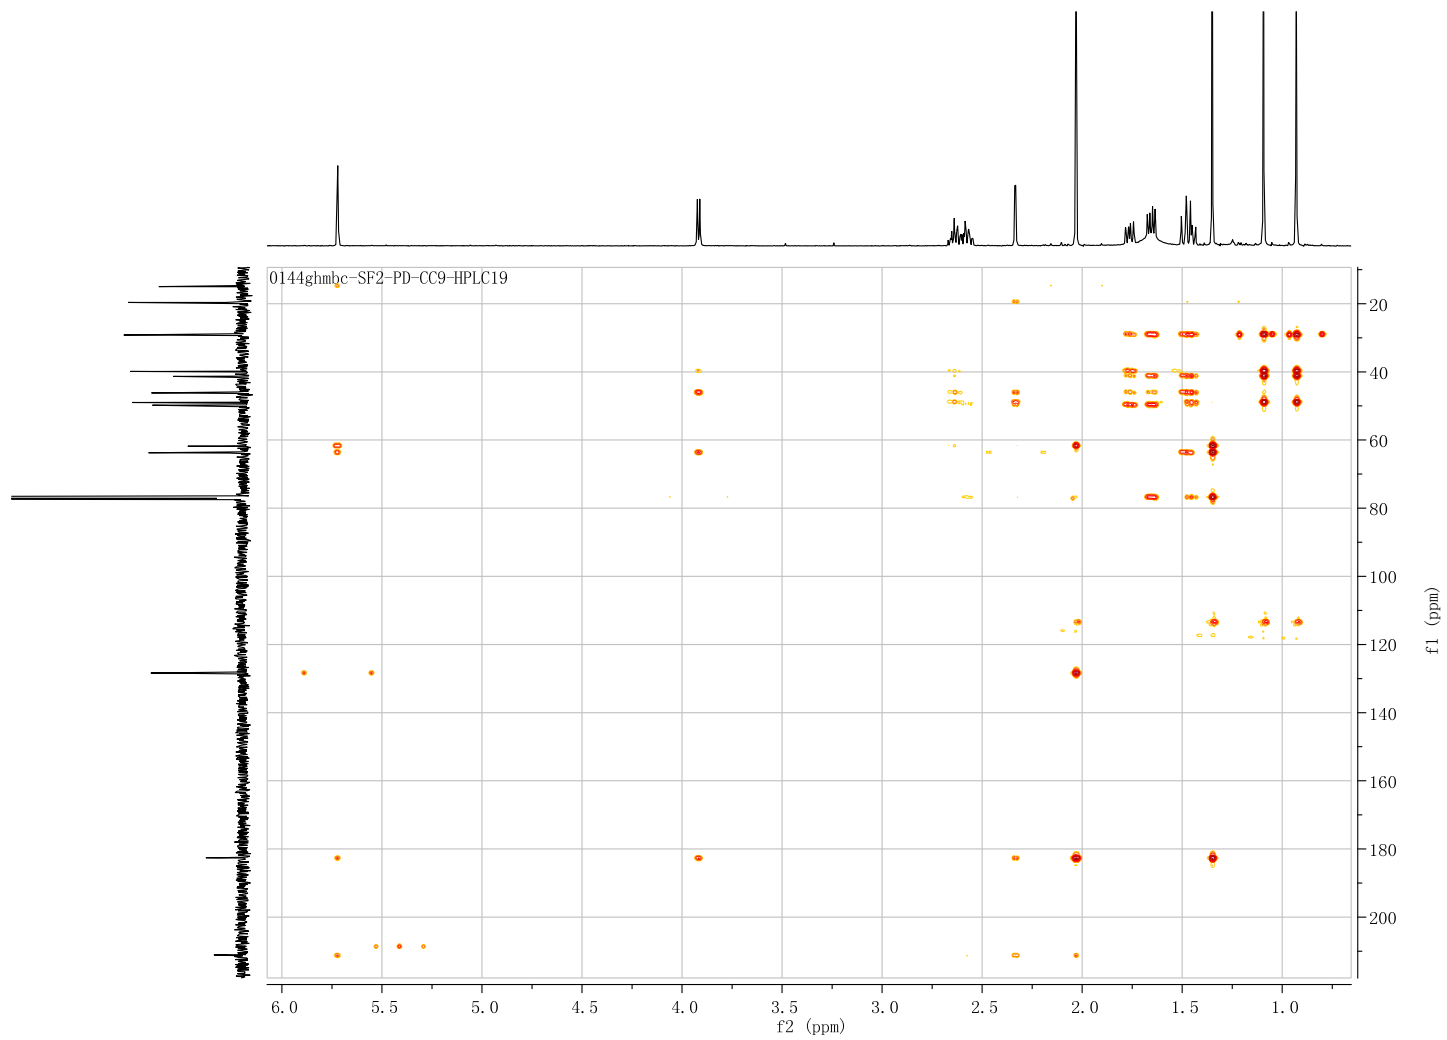

S31: gHMBC of chondrosterin E (5)

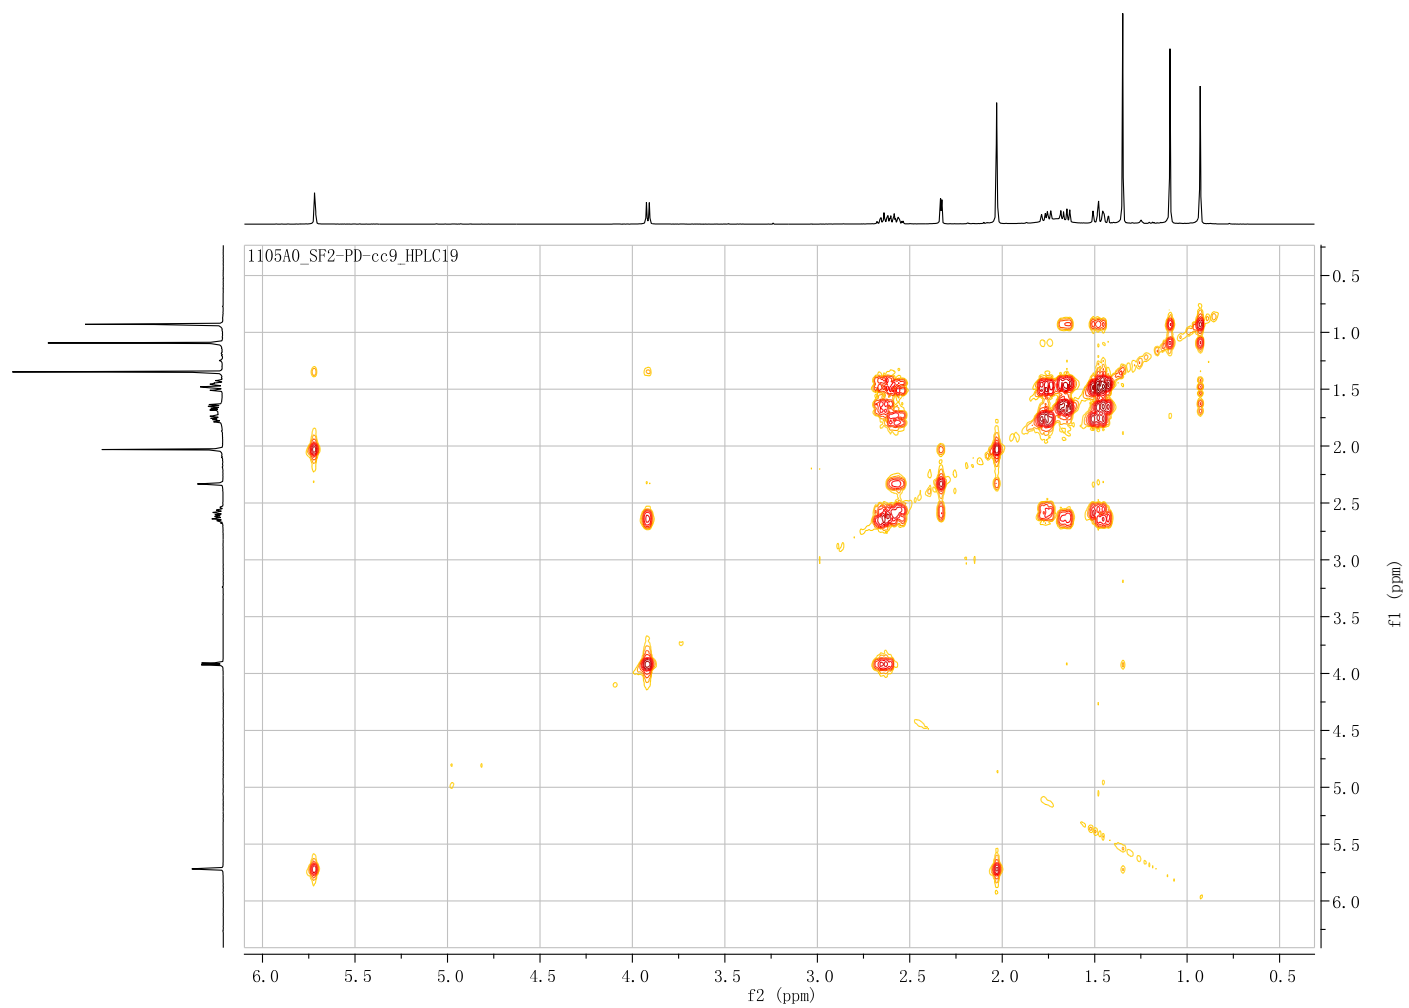

S32:  $^1\text{H}$ - $^1\text{H}$  gCOSY of chondrosterin E (5)

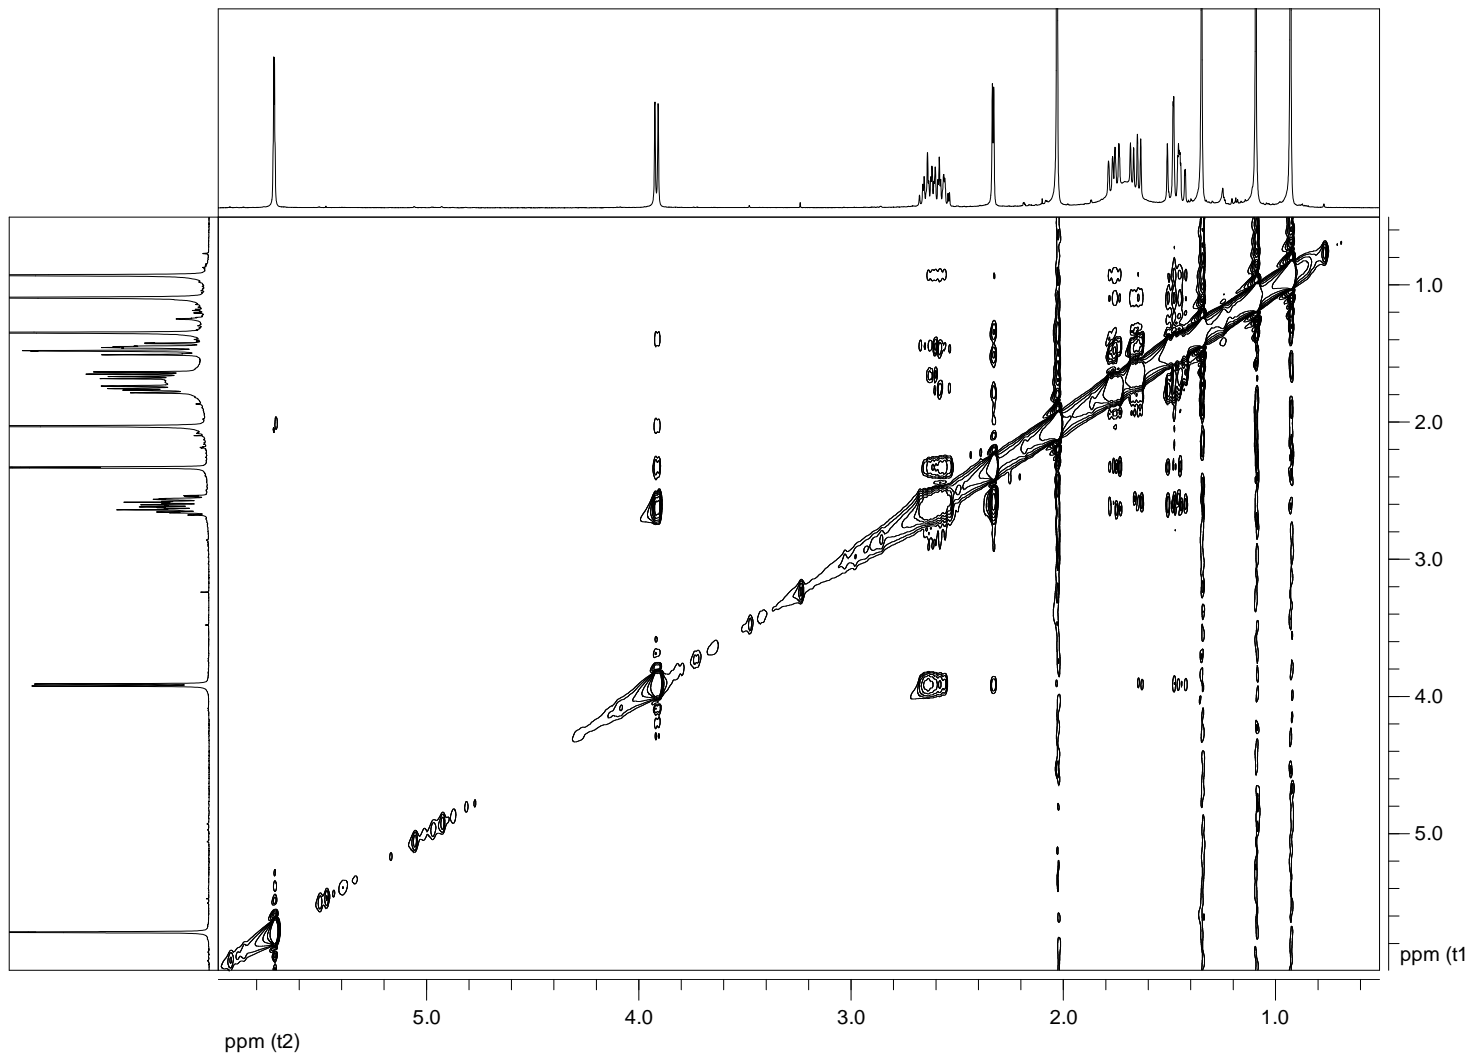

S33: ROESY of chondrosterin E (5)
